# Maternal cigarette smoking and cleft lip and palate: A systematic review and meta-analysis

## Author names:

Matthew Fell<sup>1</sup>, BSc, MBChB, MRCS  
Kyle Dack<sup>2</sup> BSc, MSc  
Shaheel Chummun<sup>3</sup> MBBS, FRCS(Plast), MASurg (Cranio)  
Jonathan Sandy<sup>1</sup>, PhD, MOrth, F Med Sci  
Yvonne Wren<sup>1</sup>, BSc (Hons), Med, PhD  
Sarah Lewis<sup>2</sup> BSc, PhD

## Corresponding author:

Matthew Fell  
The Cleft Collective  
Bristol Dental School  
University of Bristol  
Oakfield House  
Oakfield Grove  
Bristol  
BS8 2BN  
United Kingdom

Mobile: 0044 (0)1179505050

[Mattfell@doctors.org.uk](mailto:Mattfell@doctors.org.uk)

**Running title:** Association between maternal smoking and cleft

## Financial support:

MF is supported by the VTCT Foundation for a research fellowship with the Cleft Collective at the University of Bristol

KD is supported by a PhD studentship from the MRC Integrative Epidemiology Unit at the University of Bristol (faculty matched place for MRC and Peter and Jean James Scholarship)

SL is supported by a project grant from the Medical Research Council (MR/T002093/1)

---

<sup>1</sup> The Cleft Collective, Bristol Dental School, University of Bristol, United Kingdom

<sup>2</sup> Medical Research Council Integrative Epidemiology Unit, University of Bristol, United Kingdom  
NOTE: This preprint reports new research that has not been certified by peer review and should not be used to guide clinical practice.

<sup>3</sup> South West Cleft Service, University Hospitals Bristol and Weston NHS Trust, Bristol, United Kingdom

**Acknowledgements:**

The authors thank Emma Place, Bristol Dental School Librarian, for her help with this study

## **Abbreviations:**

- CI – Confidence Interval
- CL $\pm$ P – Cleft Lip  $\pm$  Palate
- CP – Cleft Palate Only
- NOS – Newcastle Ottawa Scale
- CL/P – Cleft lip and/or cleft palate
- OR – Odds Ratio
- PAF – Proportional Attributable Fraction

## **ABSTRACT**

**Objectives:** A systematic review and meta-analysis to determine the association between active maternal smoking and cleft lip and palate etiology.

**Data Sources:** Medline, Embase, Web of Science and the Cochrane database from inception to November 2020.

**Study selection:** Observational studies of cigarette smoking habits in pregnant women. Outcomes included cleft lip and/or palate, cleft lip  $\pm$  palate and cleft palate only.

**Data analysis:** Publication bias analyses were performed and the Newcastle Ottawa scales were used to assess study quality. Fixed or random effect models were used in the meta-analysis, dependent on risk of statistical heterogeneity.

**Results:** Forty-five studies were eligible for inclusion of which 11 were cohort and 34 were case-control studies. Sixteen studies were of sufficient standard for inclusion in the meta-analysis. The summary odds ratio for the association between smoking and cleft lip and/or palate was 1.42 (95%CI 1.27 to 1.59) with a population attributable fraction of 4% (95%CI 3% - 5%). There was limited evidence to show a dose-response effect of smoking.

### **Conclusions:**

This review reports a moderate association between maternal smoking and orofacial cleft but the overall quality of the conventional observational studies included was poor. There is a need for high quality and novel research strategies to further define the role of smoking in the etiology of cleft lip and palate.

### **Keywords:**

Cleft lip and palate, cleft palate, orofacial cleft, pregnancy, smoking

## INTRODUCTION

Cleft lip and/or palate (CL/P) is one of the most common craniofacial birth defects, occurring in approximately 1/700 births (Mossey et al., 2009). It affects children and their families because of appearance and functional difficulties with speech, eating, social interaction and child development. Seventy percent of children born with CL/P do not have an associated syndrome and the anomaly is believed to be caused by a complex pattern of inheritance with both genetic and environmental influences (Lebby et al., 2010). Defining the role of potentially modifiable environmental factors could reduce the incidence of this congenital abnormality (Raut et al., 2019). Maternal smoking is a modifiable environmental factor, which is considered a causal factor for CL/P in the 2014 US Surgeon General's Report (United States Department of Health and Human Services 2014).

Cigarette smoke is a complex aerosol comprising more than 4,000 different compounds that can cause harm (Martelli et al., 2015). Maternal smoking has attracted research interest because it is a common exposure and has been established as a risk factor for a spectrum of adverse offspring outcomes including preterm birth, low birth weight and birth anomalies (Krueger and Rohrich 2001; Hackshaw et al., 2011). It is biologically plausible that maternal smoking could cause CL/P, although the exact mechanism is unknown (Leite et al., 2002; Krapels et al., 2008). There may be a direct interaction of the smoking products with neonatal tissue, leading to induced hypoxia because of impaired angiogenesis and nicotine-mediated vasoconstriction, which has been shown to disrupt palatal fusion in animal models (Vieira and Dattilo, 2018). An alternative

theory is that smoking affects DNA methylation in the fetus, which could impact upon gene expression responsible for lip and palate formation (Lebby et al., 2010).

Three previous meta-analyses have demonstrated weak to moderate links between maternal smoking and CL/P (Wyszynski et al., 1997; Julian Little et al., 2004; Xuan et al., 2016;). Whilst previous systematic reviews have been comprehensive, the included studies were not assessed for their quality and this might have compromised the validity of the findings (Crossan and Duane, 2018). Potential sources of bias in the primary studies include no adjustment for confounders, inappropriate control groups and recall bias. There is a need for an updated systematic review with rigorous methodology in this field. We conducted a systematic review and meta-analysis in order to determine the role of active maternal cigarette smoking in the etiology of CL/P.

## **METHODS**

### **Identification of studies**

A full protocol of this systematic review, carried out following PRISMA guidance (Moher et al., 2009), was adhered to (see supplementary Table 1) and is available from the PROSPERO systematic review register (registration number CRD42020222837; [https://www.crd.york.ac.uk/prospERO/display\\_record.php?ID=CRD42020222837](https://www.crd.york.ac.uk/prospERO/display_record.php?ID=CRD42020222837)).

Eligible studies were defined as full-text primary-data publications reporting on pregnant women from the general population who were assessed for pre-natal active cigarette smoking. Studies were required to document maternal smoking (either in the peri-conception period or any of the three trimesters) but the assessment of smoking status could have been performed prospectively or retrospectively. Studies of passive (or environmental) maternal smoking or paternal smoking were not included. The protocol included all epidemiological studies using an analytical design whereby an exposed group was compared to an unexposed group. Cohort, case-control, quasi-experimental, natural experiment, family based negative control and Mendelian Randomization study designs were eligible.

The outcome of interest was a live born child with CL/P or subtypes such as cleft lip only, cleft lip  $\pm$  palate (CL $\pm$ P), cleft palate only (CP) or submucous cleft. Where studies made a distinction between children born with an isolated cleft or a cleft co-occurring with other anomalies, or where results were provided for those with non-syndromic and syndromic orofacial clefts separately, effect estimates for isolated and non-syndromic clefts were extracted preferentially.

Studies were excluded if: full text was unavailable; they were conference proceedings only; they were descriptive studies such as case studies, case series, cross-sectional studies, expert opinion, letter, editorials or studies using secondary data such as reviews; they were animal studies; or there was insufficient data to estimate the effect size of the association between maternal

smoking and CL/P (see Supplementary Table 2 for exclusion and exclusion criteria).

The databases searched included Medline, Embase, the Web of Science and the Cochrane Library from inception to 9<sup>th</sup> November 2020. The search was tailored individually to each database with input from a University Librarian (see Supplementary Figures 1-4 for search strategies) and there was no language restriction. The search focused on published literature and did not include grey literature. In addition, manual searches of reference lists of recent relevant systematic reviews and all studies included in the systematic review were performed.

Titles and abstracts were reviewed independently by two reviewers (MF/KD) according to the specified inclusion/exclusion criteria and differences resolved through discussion to reach a consensus. Where an abstract was not available or where a decision on inclusion/exclusion could not be reached by reviewing the abstract alone, full text screening was similarly performed independently by two reviewers for inclusion and any disagreements resolved through discussion. When multiple reports of a study were identified, the study with the greatest number of patients was selected. The Rayyan web application was used to facilitate the screening process (Ouzzani et al., 2016).

### **Data extraction**

Data was extracted via Microsoft Forms into an excel spreadsheet. Data extracted included: title, authors, publication year, country of study population, study



design, sample description, sample size, outcomes recorded, confounding factors measured and study outcomes including dose-response data. Adjusted measures of effect were extracted preferentially to reduce the impact of confounding factors. Data from each study was extracted by one reviewer (MF) and checked for accuracy by a second reviewer (KD)(Centre for Reviews and Dissemination, 2009).

### **Assessment of study quality**

The Newcastle-Ottawa Scale (NOS)(Wells et al., 2000) was used to assess the quality of cohort and case-control studies included in this systematic review. The NOS for cohort studies consists of eight questions amongst three domains (selection, comparability and outcome). Similarly, the NOS for case-control studies consists of eight questions amongst three domains (selection, comparability and exposure). Stars are awarded for adequate methodology and were used to allocate a score of good, fair or poor to each study with pre-defined criteria (see Supplementary Table 3). Good and fair studies were deemed appropriate for meta-analysis, whereas studies categorized as poor were deemed to be of too low quality for inclusion. Maternal age and maternal alcohol consumption were identified as the most important confounding factors, followed by folic acid supplementation and obesity, based on previous findings (Bille et al., 2005; Badovinac et al., 2007; Molina-Solana et al., 2013; Izedonmwun et al., 2015). Studies were required to adjust for maternal age and alcohol consumption in order to achieve at least a 'fair' rating and be included in the meta-analysis.

Funnel plots were used to visually assess the likelihood of small study publication bias if more than 10 studies were included and Egger's test was calculated to quantify funnel plot asymmetry (Sterne et al., 2011).

### **Data Synthesis**

A descriptive summary and narrative analysis of the included studies was performed, alongside an indication of study quality, in accordance with published guidance (Popay et al., 2006). Heterogeneity of the included studies was analyzed by exploring the study characteristics and using the  $I^2$  statistic where sufficiently similar studies were meta-analyzed.

The quantitative impact of maternal smoking as a cause of orofacial clefting was investigated using meta-analysis techniques where studies met the quality criteria for inclusion and shared sufficient methodological homogeneity. The minimum number of studies to conduct a meta-analysis was two. Pooled estimates for binary outcomes were calculated using the inverse variance method. The odds ratio (OR) was the principle summary measure extracted from the primary studies and meta-analyzed. The fixed effects model was used where levels of statistical heterogeneity were low ( $I^2 < 50\%$ ); otherwise the random effects model was used. The population attributable fraction (PAF) was calculated to assess the public health impact (Mansournia and Altman, 2018) using the pooled odds ratio and the prevalence of exposure among cases (Miettinen, 1974). The dose-response impact of maternal smoking was analyzed for studies in which the smoking dose categories used by the included studies were analogous. Subgroup meta-analysis of the smoking dose categories was

performed using the random effects model. Meta-analysis was performed using the “meta” package (Harrer et al., 2021) via the R Project for Statistical Computing (<http://www.R-project.org/>).

## **RESULTS**

### **Study Selection and Study Characteristics**

A flowchart for the article review process is shown in Figure 1. A total of 1334 citation records were identified from searching the four databases. A manual search of relevant systematic reviews and included studies identified 15 additional studies. After exclusions (see Supplementary Table 4), 45 studies from 44 publications were included in the systematic review (one publication reported two case-control studies from distinctly separate populations (Shi et al., 2007); 11 cohort studies and 34 case control studies (see Table 1). In total, 28,405 mothers giving birth to a live born child with CL/P have had their smoking status during pregnancy analyzed amongst the 45 studies.

### **Reported outcomes**

Twenty-two studies reported on CL/P outcome, with the funnel plot not indicating publication bias (see Supplementary Figure 5) and an Egger’s test of 0.77 (95% Confidence Interval (CI): 0.32, 1.85,  $P=0.18$ ). Nineteen studies

reported on CL±P outcome with the funnel plot not indicating publication bias and an Egger's test of 0.09 (95% CI: -0.1, 1.17,  $P=0.88$ ). Nineteen studies reported on CP outcome with the funnel plot not indicating publication bias and an Egger's test of -0.28 (95% CI: -1.77, 1.2,  $P=0.71$ ). As only two studies reported with cleft lip alone as the outcome, a funnel plot was not performed for these. Nine studies reported smoking dose-response effects for CL/P outcome, a further 14 studies gave results by smoking dose for CL±P as the outcome and 13 studies for CP as the outcome.

Table 2 shows the study quality assessment for cohort and case-control studies based on the NOS. Only one study (Raut et al., 2019) of the 45 included studies had low scores in all eight NOS questions. Three studies were deemed to be good quality, 13 studies were deemed fair quality, and 29 deemed poor quality and the latter were excluded from the meta-analysis. A greater proportion of cohort studies (5/11) met the quality threshold for meta-analysis inclusion than case-control studies (11/34). The most common area lacking was the failure to adjust for confounding factors. The potential for exposure recall bias was present in all 34 of the case-control studies as by definition, information on exposure was collected retrospectively. Only four out of 11 cohort studies collected maternal smoking exposure data prospectively.

All of the 11 cohort studies were truly or somewhat representative of the general population and were able to demonstrate the outcome of interest was not present at the start of the study. Of the case control studies, 7 out of 34 did not meet the participant selection domain criteria due to failing to demonstrate

independent validation of case definition (11 of 34), the potential for selection bias of cases (23 of 34) and/or selected controls from hospitalized populations (21/34).

Comparability criteria was not met in 6 out of 11 cohort studies and 20 out of 34 case-control studies due to not adjusting for at least maternal age and maternal alcohol consumption as confounders in the analysis. Folic acid supplementation and obesity were adjusted for in less than half of included studies (see Supplementary Table 5).

All of the 11 cohort studies used record linkage to verify OFC outcome. Exposure criteria was not met by 18 out of 34 case-control studies because of relying on self-assessment (8 of 34), using an interviewer who was not blinded to case/control status (23 of 34) and/or the non-response rate of cases/controls was not described (20 of 34).

### **Meta-analysis**

Five studies reporting effect estimates for smoking and CL/P were included in the meta-analysis (see Figure 2). There was no strong evidence of between study heterogeneity ( $I^2=27\%$ ,  $P=0.24$ ). The pooled OR using the fixed effects model was 1.42 (95% CI: 1.27, 1.59). Based on the proportion of maternal smoking amongst case mothers of 14% in these five studies, the PAF was 4% (95% CI: 3%, 5%).

Six studies reporting the effect for smoking and  $CL\pm P$  were included in the meta-analysis (see Figure 3). There was no evidence for statistical heterogeneity

between the studies ( $I^2 = 0\%$ ,  $P=0.67$ ). The pooled OR using the fixed effects model was 1.31 (95% CI: 1.19, 1.45). Five studies reporting measures of effect for smoking and CP were included in the meta-analysis (see Figure 4). The statistical heterogeneity between the studies was high ( $I^2 = 81\%$ ,  $P<0.01$ ) due to an outlying case-control study performed in Hungary (Ács et al., 2020), reporting a stronger positive effect of smoking on CP than the other included studies. The pooled OR using the random effects model was 1.49 (95% CI: 1.01, 12.19). The exclusion of the outlying study in the CP meta-analysis resulted in no evidence for statistical heterogeneity ( $I^2 = 0\%$ ,  $P=0.49$ ) and a fixed effect pooled OR of 1.25 (95% CI: 1.09, 1.44). It was not possible to calculate the PAF for maternal smoking and CL±P or CP due to missing data in included studies, precluding calculation of prevalence of exposure.

Individual study effect estimates and pooled analysis for all studies included in this systematic review reporting outcomes for CL/P, CL±P and CP can be found in Supplementary Figures 6-8.

### **Subgroup analysis**

Five studies reporting measures of effect for the dose of smoking and CL/P were included in the subgroup meta-analysis (see Figure 5). All five studies measured three doses of smoking (low, medium and high) with comparable numbers of cigarettes smoked per day at each dose (1-10, 11-20 and >20 cigarettes per day). The pooled OR for the lowest dose of smoking was 1.20 (95% CI: 1.06, 1.36), for intermediate dose was 1.15 (95% CI: 0.97, 1.37) and highest dose was 1.45 (95% CI: 1.05, 2.00).

Four studies were eligible for inclusion into the meta-analysis of the effect of smoking dose for both CL±P and CP respectively, but it was not possible to perform a meta-analysis because the reported smoking dose levels were not comparable.

## **DISCUSSION**

### **Summary of evidence**

There has been a large body of work to investigate the role of active maternal smoking in CL/P etiology, as shown by the 45 studies that met our inclusion criteria. This high volume of research should have provided a clear indication of the association between maternal smoking and CL/P, but the poor quality of studies overall has compromised the reliability of the reported findings. Only three studies out of the 45 included in this review were judged to be of good quality (Grewal et al., 2008; Raut et al., 2019; Sato et al., 2020;). The most common reason for poor quality within the studies was a failure to adjust for recognized confounding factors, placing the analyses at high risk of bias. Mother's age, alcohol intake and obesity are all strongly associated with smoking behavior and all have been hypothesized to be risk factors for orofacial clefts. Furthermore, alcohol intake during pregnancy is a known teratogen, making the adjustment of these confounding risk factors even more critical (Carreras-Torres et al., 2018; Taylor et al., 2018; Taylor et al., 2019).

Our meta-analysis suggests that maternal smoking may have a moderate role in CL/P etiology with pooled OR of 1.42 (95% CI: 1.27, 1.59). The PAF estimates the proportion of the disease that would be reduced by eliminating exposure to a given risk factor, assuming the risk factor is causal. Smoking has previously been found to account for the largest risk when PAFs are calculated for a number of modifiable risk factors for CL/P (Raut et al., 2019). The pooled PAF of 4% (95% CI: 3%, 5%) in this review is similar to the previously reported range of 4-6% from three individual studies (Honein et al., 2007; Honein et al., 2014; Raut et al., 2019;). The indication here is that should maternal smoking be eliminated, 4% of CL/P would not occur. Evidence of a dose-response relationship can add support to a causal relationship. The analysis of dose effect in CL/P demonstrated the highest dose of smoking (>20 cigarettes per day) to have the strongest positive effect on risk of cleft, but the intermediate smoking dose (11-20 cigarettes per day) had a similar effect to the lowest dose (1-10 cigarettes per day). This may represent a threshold effect of more than 20 cigarettes needing to be smoked a day before a difference is noted in CL/P etiology. Alternatively, the greater effect in the highest smoking dose may reflect the propensity for risk taking behaviors associated with additional confounding by substance abuse (such as alcohol), which may not have been adequately adjusted for. The effect of the highest smoking dose on CL/P etiology should be interpreted with caution as the number of cases within the individual studies were less than for low and medium smoking doses, therefore the effect estimates were less precise.

Historically, CL/P has been subdivided in to CL±P and CP, reflecting different embryological origins from the primary palate and secondary palate respectively



(Dixon et al., 2011). Studies included in this review reported individual outcomes for CL±P and CP and the respective pooled ORs demonstrated a moderately positive association with maternal smoking, similar to that of OFC. The pooled OR for CP (OR = 1.49) was greater than for CL±P (OR = 1.31) and this is an inverse of the relationship reported in two previous meta-analyses (Little et al., 2004; Xuan et al., 2016). The pooled OR for CP reported in this review should be interpreted with caution as it was influenced by the outlying result of a single study (Ács et al., 2020), with a heterogeneity between studies present. The only study with a good quality rating included in the CP meta-analysis (Raut et al., 2019), reported a more modest measure of effect, therefore the pooled OR following exclusion of the outlying study (OR = 1.25) may be a more accurate representation of the effect of smoking on CP etiology.

### **Strengths and Limitations**

Strengths of this review include a comprehensive search strategy with concerted efforts made to include all languages and a wide variety of study designs. Thorough assessment of study quality facilitated the inclusion of studies into the meta-analysis only if they met pre-defined threshold criteria.

The main limitation of interpreting the results from the meta-analysis relate to the inherent flaws of the standard analytical cohort and case-control approaches and their associated potential for bias. Studies were included in the meta-analysis if they had adjusted for a minimum set of confounders (maternal age and maternal alcohol consumption), which means that there was scope for

additional important confounding factors to be unaccounted for. Even when adjustment for all relevant confounding factors is performed, bias may be present due to inaccurate measurement of confounding factors, misclassifications of exposure and differential missing data (Lawlor et al., 2016). The small sample sizes of some studies included in the meta-analysis meant their effect estimates were imprecise. A dose-response relationship could not be tested in CL±P and CP outcomes due to differences in smoking dose categorization reported in the included studies. Restriction of the search to published studies could have introduced publication bias, despite the evidence for publication bias being weak. This review focused upon active cigarette smoking in females and whilst the association of both passive and paternal smoking on CL/P has been reported, there has been less scientific focus in these areas when compared to active maternal smoking (Savitz et al., 1991; Krapels et al. 2008; Figueiredo et al. 2015; Hao et al. 2015; Sabbagh et al. 2015).

### **Interpretation**

Our understanding of the causal role of maternal smoking in CL/P is limited because of biases affecting traditional observational methods and the impracticalities of performing randomized controlled trials in this setting. If our reported moderate association is an accurate reflection of the role that maternal smoking plays then we would predict that the elimination of this risk factor would result in the reduction of 8,000 less cases per year worldwide as it is estimated that 200,000 children are born with CL/P per year (Mossey et al., 2009; The Central Intelligence Agency, 2021). This estimation is based on a 14% prevalence of maternal smoking in case mothers, originating from high income

country publications, whereas the World Health Organisation estimates 17% of the global population use tobacco products, mostly from low and middle income countries (World Health Organisation, 2020).

The potential for maternal smoking to play a moderate role in CL/P etiology fits within our current understanding about the cause of CL/P being complex, multifactorial and involving both environmental and genetic factors (Dixon et al. 2011). Gene-environment interactions between smoking and CL/P have been the focus of a number of studies over the last two decades and these have improved our understanding of the pathogenesis of CL/P (Vieira, 2008; Krapels et al., 2008; Beaty et al., 2016; Garland et al., 2020). If smoking only accounts for 4% of the population attributable fraction, the environmental and genetic factors accounting for the remaining 96%, and the interplay between them, remains to be defined.

### **Recommendations / implications for practice/policy/ further research**

This review seeks to address an important public health question regarding the role of maternal smoking in CL/P etiology. Tobacco use is still common worldwide in pregnancy and is the focus of campaigns by the World Health Organisation to reduce adverse health effects on woman and infants (World Health Organisation, 2013). The neonatal health risk associated with maternal smoking were highlighted to the public in 2014 by the U.S Surgeon General's Report, with smoking reported to increase the risk of CL/P by 30-50% (United States Department of Health and Human Services, 2014). Focus group research has highlighted the difficulties of changing smoking behaviors in pregnant

women but suggests educational information with pictorial representation of babies risk may be an effective motivational method (Levis et al., 2014).

The methodologies used by the 45 eligible studies were all conventional observational design (cohort or case control designs). To strengthen our understanding of the causal role of maternal smoking in CL/P, this review highlights the need for high quality studies using a variety of methodological approaches with different directions of bias (Pearce et al., 2019). An instrumental variable model using genetic variants as proxies for smoking has been used in the past to assess the effect of maternal smoking on CL/P risk and reported a substantially stronger positive effect than traditional analytic studies, but the genetic variants used were not strongly associated with smoking and the sample size was small (Wehby et al., 2011). More powerful studies, using multiple novel epidemiological designs that can overcome some of the limitations of traditional methods are required and have been used as part of a triangulated approach to further the understanding of the causal role of cigarette smoking for other health outcomes (Gage et al., 2020).

## REFERENCES

- Ács L, Bányai D, Nemes B, Nagy K, Ács N, Bánhidly F, Rózsa N. Maternal-Related Factors in the Origin of Isolated Cleft Palate—A Population-Based Case-Control Study. *Orthodont Craniofac Res.* 2020;23:174–180.
- Angulo-Castro E, Acosta-Alfaro LF, Guadron-Llanos AM, Canizalez-Román A, Gonzalez-Ibarra F, Osuna-Ramírez I, Murillo-Llanes J. Maternal Risk Factors Associated with the Development of Cleft Lip and Cleft Palate in Mexico: A Case-Control Study. *Iran J Otorhinolaryngol.* 2017;29:189–195.
- Auslander A, McKean-Cowdin R, Brindopke F, Sylvester B, DiBona M, Magee K, Kapoor R, Conti DV, Rakotoarison S, Magee W. The Role of Smoke from Cooking Indoors over an Open Flame and Parental Smoking on the Risk of Cleft Lip and Palate: A Case- Control Study in 7 Low-Resource Countries. *J Glob Health.* 2020;10:020410.
- Badovinac RL, Werler MM, Williams PL, Kelsey KT, Hayes C. Folic Acid-Containing Supplement Consumption during Pregnancy and Risk for Oral Clefts: A Meta-Analysis. *Birth Defects Res A Clin Mol Teratol.* 2007;79:8–15.
- Beaty TH, Wang H, Hetmanski JB, Fan YT, Zeiger JS, Liang KY, Chiu YF, Vanderkolk CA, Seifert KC, Wulfsberg EA Raymond G, Panny SR, McIntosh I. A Case-Control Study of Nonsyndromic Oral Clefts in Maryland. *Ann Epidemiol* 2001;11: 434–442.
- Beaty TH, Marazita ML, Leslie EJ. Genetic Factors Influencing Risk to Orofacial Clefts: Today’s Challenges and Tomorrow’s Opportunities. *F1000Res.* 2016;5:2800

- Bezerra JF, Oliveiran GHM, Soares CD, Cardoso ML, Ururahy MAG, Neto FPF, Lima-Neto LG, Luchessi AD, Silbiger VN, Fajardo CM, de Oliveira SR, Almeida MG, Hirata RDC, de Rezende AA, Hirata MH. Genetic and Non-Genetic Factors That Increase the Risk of Non-Syndromic Cleft Lip and/or Palate Development. *Oral Dis*. 2015;21:393–399.
- Bille c, Olsen J, Vach W, Knudsen VK, Olsen SF, Rasmussen K, Murray JC, Andersen AMN, Christensen K. Oral Clefts and Life Style Factors - A Case-Cohort Study Based on Prospective Danish Data. *Eur J Epidemiol*. 2007;22:173–181.
- Bille C, Skyttthe A, Vach W, Knudsen LB, Andersen AMN, Murray JC, Christensen K. 2005. Parent's Age and the Risk of Oral Clefts. *Epidemiol*. 2005;16:311–316.
- Carreras-Torres R, Johansson M, Haycock PC, Relton CL, Davey Smith G, Brennan P, Martin RM. Role of Obesity in Smoking Behaviour: Mendelian Randomisation Study in UK Biobank. *BMJ*. 2018;361.k1767
- Centre for Reviews and Dissemination. Systematic Reviews: *CRD's Guidance for Undertaking Reviews in Health Care*. Univeristy of York, 2009: York Publishing Services.
- Chevrier C, Bahuau M, Perret C, Iovannisci DM, Nelva A, Herman C, Vazquez MP, Francannet C, Robert-Gnansia E, Lammer EJ, Cordier S. Genetic Susceptibilities in the Association between Maternal Exposure to Tobacco Smoke and the Risk of Nonsyndromic Oral Cleft. *Am J Med Genet A* 2008;146A: 2396–2406.
- Chung KC, Kowalski CP, Kim HM, Buchman SR. Maternal Cigarette Smoking during Pregnancy and the Risk of Having a Child with Cleft Lip/Palate. *Plast Reconstr Surg*. 2000;105:485–491.

Crossan E, Duane B. Is There an Association between Maternal Smoking and Oral Clefts? *Evid Based Dent*. 2018;19:24–25.

DeRoo LA, Gaudino JA, Edmonds LD. Orofacial Cleft Malformations: Associations with Maternal and Infant Characteristics in Washington State. *Birth Defects Res A Clin Mol Teratol*. 2003;67(9):637–642.

Dixon MJ, Marazita ML, Beaty TH, Murray JC. Cleft Lip and Palate: Understanding Genetic and Environmental Influences. *Nat Rev Genet*. 2011;12:167–178.

Ebadifar A, Hamed R, Khorramkhorshid HR, Kamali K, Moghadam FA. Parental Cigarette Smoking, Transforming Growth Factor-Alpha Gene Variant and the Risk of Orofacial Cleft in Iranian Infants. *Iran J Basic Med Sci*. 2016;19:366–373.

Figueiredo JC, Ly S, Magee KS, Ihenacho U, Baurley JW, Sanchez-Lara PA, Brindopke F, Nguyen THD, Nguyen V, Tangco MI, Giron M, Abrahams T, Jang G, Vu A, Zolfaghari E, Yao CA, Foong A, DeClerk YA, Samet JM, Magee W III. Parental Risk Factors for Oral Clefts among Central Africans, Southeast Asians, and Central Americans. *Birth Defects Res A Clin Mol Teratol*. 2015;103: 863–879.

Gage SH, Sallis HM, Lassi G, Wootton RE, Mokrysz C, Davey Smith G, Munafò MR. Does Smoking Cause Lower Educational Attainment and General Cognitive Ability? Triangulation of Causal Evidence Using Multiple Study Designs. *Psychol Med*. 2020;1-9:Online ahead of print

Garland MA, Sun B, Zhang S, Reynolds K, Ji Y, Zhou CJ. Role of Epigenetics and MiRNAs in Orofacial Clefts. *Birth Defects Res*. 2020;112:1635-1659

Grewal J, Carmichael SL, Ma C, Lammer EJ, Shaw GM. Maternal Periconceptional Smoking and Alcohol Consumption and Risk for Select Congenital

- Anomalies. *Birth Defects Res A Clin Mol Teratol* 2008;82:519–526.
- Gunnerbeck A, Bonamy AKE, Wikström AK, Granath F, Wickström R, Cnattingius S. Maternal Snuff Use and Smoking and the Risk of Oral Cleft Malformations - A Population-Based Cohort Study. *PLoS ONE*. 2014;9:e84715
- Hackshaw A, Rodeck C, Boniface S. Maternal Smoking in Pregnancy and Birth Defects: A Systematic Review Based on 173 687 Malformed Cases and 11.7 Million Controls. *Hum Reprod Update*. 2011;17:589-604
- Hao Y, Tian S, Jiao X, Mi N, Zhang B, Song T, An L, Zheng X, Zhuang D. Association of Parental Environmental Exposures and Supplementation Intake with Risk of Nonsyndromic Orofacial Clefts: A Case-Control Study in Heilongjiang Province, China. *Nutrients*. 2015;7:7172–7184.
- Harrer M, Cuijpers P, Furukawa TA, Ebert DD. Doing Meta-Analysis in R: A Hands-on Guide. Available at: [https://bookdown.org/MathiasHarrer/Doing\\_Meta\\_Analysis\\_in\\_R/](https://bookdown.org/MathiasHarrer/Doing_Meta_Analysis_in_R/). Accessed February 9, 2021.
- Honein MA, Devine O, Grosse SD, Reefhuis J. Prevention of Orofacial Clefts Caused by Smoking: Implications of the Surgeon General’s Report. *Birth Defects Res A Clin Mol Teratol*. 2014;100:822–825.
- Honein MA, Rasmussen SA, Reefhuis J, Romitti PA, Lammer EJ, Sun L, Correa A. Maternal Smoking and Environmental Tobacco Smoke Exposure and the Risk of Orofacial Clefts. *Epidemiology*. 2007;18:226–233.
- Hwang SJ, Beaty TH, Panny SR, Street NA, Joseph JM, Gordon S, McIntosh I, Francomano CA. Association Study of Transforming Growth Factor Alpha (TGF $\alpha$ ) Taqi Polymorphismand Oral Clefts: Indication of Gene-Environment Interaction in a Population-Based Sample of Infants with Birth Defects. *Am J*



*Epidemiol.* 1995;142:629–636.

Ibarra-Lopez JJ, Duarte P, Antonio-Vejar V, Calderon-Aranda ES, Huerta-Beristain G, Flores-Alfaro E, Moreno-Godinez ME. Maternal C677T MTHFR Polymorphism and Environmental Factors Are Associated with Cleft Lip and Palate in a Mexican Population. *J Investig Med.* 2013;61:1030–1035.

Izedonmwun OM, Cunningham C, Macfarlane TV. What Is the Risk of Having Offspring with Cleft Lip/Palate in Pre-Maternal Obese/Overweight Women When Compared to Pre-Maternal Normal Weight Women? A Systematic Review and Meta-Analysis. *J Oral Maxillofac Res.* 2015;6:1–22.

Källén K. Maternal Smoking and Orofacial Clefts. *Cleft Palate Craniofac J.* 1997;34:11–16.

Khoury MJ, Gomez-Farias M, Mulinare J. Does Maternal Cigarette Smoking During Pregnancy Cause Cleft Lip and Palate in Offspring? *Am J Dis Child.* 1989;143:333–337.

Krapels IPC, Raijmakers-Eichhorn J, Peters WHM, Roelofs HMJ, Ras F, Steegers-Theunissen RPM. The I105V Polymorphism in Glutathione S-Transferase P1, Parental Smoking and the Risk for Nonsyndromic Cleft Lip with or without Cleft Palate. *Eur J Hum Genet.* 2008;16: 358–366.

Krapels IPC, Zielhuis GA, Vroom F, De Jong-Van Den Berg LTW, Kuijpers-Jagtman AM, Van Der Molen ABM, Steegers-Theunissen RPM. Periconceptional Health and Lifestyle Factors of Both Parents Affect the Risk of Live-Born Children with Orofacial Clefts. *Birth Defects Res A Clin Mol Teratol.* 2006;76:613–620.

Krueger JK, Rohrich RJ. Clearing the Smoke: The Scientific Rationale for Tobacco Abstinence with Plastic Surgery. *Plast Reconstr Surg.* 2001;108 :1063–1073.

Lawlor DA, Tilling K, Davey Smith G. Triangulation in Aetiological Epidemiology.

*Int J Epidemiol.* 2016;45:1866–1886.

Lebby KD, Tan F, Brown CP. Maternal Factors and Disparities Associated with

Oral Clefts. *Ethn Dis.* 2010;20:S1-146-9

Leite I, Paumgartten F, Koifman S. Chemical Exposure during Pregnancy and Oral

Clefts in Newborns. *Cad Saude Publica.* 2002;18:17–31.

Leite ICG, Koifman S. Oral Clefts, Consanguinity, Parental Tobacco and Alcohol

Use: A Case-Control Study in Rio de Janeiro, Brazil. *Braz Oral Res.* 2009;23:31–37.

Leite M, Albieri V, Kjaer Sk, Jensen A. Maternal Smoking in Pregnancy and Risk

for Congenital Malformations: Results of a Danish Register-Based Cohort Study. *Acta Obstet Gynecol Scand.* 2014;93:825–834.

Levis DM, Stone-Wiggins B, O’Hegarty M, Tong VT, Polen KND, Cassell CH,

Council M. Women’s Perspectives on Smoking and Pregnancy and Graphic Warning Labels. *Am J Health Behav.* 2014;38:755–764.

Lie RT, Wilcox AJ, Taylor J, Gjessing HK, Saugstad OD, Aabyholm F, Vindenes H.

Maternal Smoking and Oral Clefts the Role of Detoxification Pathway Genes.” *Epidemiology.* 2008;19:606–615.

Lieff S, Olshan AF, Werler M, Strauss RP, Smith J, Mitchell A. Maternal Cigarette

Smoking during Pregnancy and Risk of Oral Clefts in Newborns. *Am J Epidemiol.* 1999;150:683–694.

Little J, Cardy A, Arslan MT, Gilmour M, Mossey PA. Smoking and Orofacial Clefts:

A United Kingdom-Based Case-Control Study. *Cleft Palate Craniofac J.* 2004;41:381–386.

Little J, Cardy A, Munger RG. Tobacco Smoking and Oral Clefts: A Meta-Analysis.

- Bull World Health Organ.* 2004;82:213–218.
- Liu Y, Wang B, Li Z, Zhang L, Liu J, Ren A. Indoor Air Pollution and the Risk of Orofacial Clefts in a Rural Population in Shanxi Province, China. *Birth Defects Res A Clin Mol Teratol.* 2016;106:708–715.
- Lorente C, Cordier S, Goujard J, Aymé S, Bianchi F, Calzolari E, De Walle HEK, Knill-Jones R. Tobacco and Alcohol Use during Pregnancy and Risk of Oral Clefts. *Am J Public Health.* 2000;90:415–419.
- Malloy MH, Kleinman JC, Bakewell JM, Schramm WF, Land GH. Maternal Smoking during Pregnancy: No Association with Congenital Malformations in Missouri 1980-83. *Am J Public Health.* 1989;79:1243–1246.
- Mansournia MA, Altman DG. Population Attributable Fraction. *BMJ* 2018;360:2–3.
- Martelli DRB, Coletta RD, Oliveira EA, Swerts MSO, Rodrigues LAM, Oliveira MC, Martelli H. Association between Maternal Smoking, Gender, and Cleft Lip and Palate. *Braz J Otorhinolaryngol.* 2015;81:514–519.
- McDonald AD, Armstrong BG, Sloan M. Cigarette, Alcohol, and Coffee Consumption and Congenital Defects. *Am J Public Health.* 1992;82:91–93.
- Meyer KA, Williams P, Hernandez-Diaz S, Cnattingius S. Smoking and the Risk of Oral Clefts: Exploring the Impact of Study Designs. *Epidemiology* 2004;15:671–678.
- Miettinen OS. Proportion of Disease Caused or Prevented by a given Exposure, Trait or Intervention. *Am J Epidemiol.* 1974;99:325–332.
- Mirilas P, Mentessidou A, Kontis E, Asimakidou M, Moxham BJ, Petropoulos AS, Emmanouil-Nikolousi EN. Parental Exposures and Risk of Nonsyndromic Orofacial Clefts in Offspring: A Case-Control Study in Greece. *Int J Pediatr*

*Otorhinolaryngol.* 2011;75:695–699.

Moher D, Liberati A, Tetzlaff J, Altman DG. Preferred Reporting Items for Systematic Reviews and Meta-Analyses: The PRISMA Statement. *PLoS Med.*

2009;6:e1000097

Molina-Solana R, Yáñez-Vico RM, Iglesias-Linares A, Mendoza-Mendoza A, Solano-Reina E. Current Concepts on the Effect of Environmental Factors on

Cleft Lip and Palate. *Int J Oral Maxillofac Surg.* 2013;42:177-184

Mossey PA, Little J, Munger RG, Dixon MJ, Shaw WC. Cleft Lip and Palate. *Lancet*

2009;374:1773–1785.

Ouzzani M, Hammady H, Fedorowicz Z, Elmagarmid A. Rayyan-a Web and Mobile App for Systematic Reviews. *Syst Rev.* 2016;5:1–10.

Pearce N, Vandenbroucke JP, Lawlor DA. Causal Inference in Environmental Epidemiology: Old and New Approaches. *Epidemiology.* 2019;30:311–316.

Popay J, Roberts H, Sowden A, Petticrew M, Arai L, Rodgers M, Britten N.

Narrative Synthesis in Systematic Reviews: A Product from the ESRC Methods Programme.” *ESRC Methods Programme.* Available at:

[https://www.lancaster.ac.uk/media/lancaster-university/content-](https://www.lancaster.ac.uk/media/lancaster-university/content-assets/documents/fhm/dhr/chir/NSsynthesisguidanceVersion1-April2006.pdf)

[assets/documents/fhm/dhr/chir/NSsynthesisguidanceVersion1-](https://www.lancaster.ac.uk/media/lancaster-university/content-assets/documents/fhm/dhr/chir/NSsynthesisguidanceVersion1-April2006.pdf)

[April2006.pdf.](https://www.lancaster.ac.uk/media/lancaster-university/content-assets/documents/fhm/dhr/chir/NSsynthesisguidanceVersion1-April2006.pdf) Accessed February 9, 2021

Raut JR, Simeone RM, Tinker SC, Canfield MA, Day RS, Agopian AJ. Proportion of

Orofacial Clefts Attributable to Recognized Risk Factors. *Cleft Palate*

*Craniofac J.* 2019;56:151–158.

Regina AS, Borges AH, de Saboia Campos Neves AT, Aranha AMF, Borba AM,

Espinosa MM, Volpato LER. Influence of Parental Exposure to Risk Factors in

the Occurrence of Oral Clefts. *J Dent (Shiraz).* 2020;21:119–126.

- Sabbagh HJ, Hassan MHA, Innes NPT, Elkodary HM, Little J, Mossey PA. Passive Smoking in the Etiology of Non-Syndromic Orofacial Clefts: A Systematic Review and Meta-Analysis. *PLoS ONE*. 2015;10:e0116963
- Salihu S, Krasniqi B, Sejfiya O, Heta N, Salihaj N, Gecaj-Gashi A, Sejdini M, Arifi H, Isufi R, Ueek BA. Analysis of Potential Oral Cleft Risk Factors in the Kosovo Population. *Int Surg*. 2014;99:161–165.
- Sato Y, Yoshioka E, Saijo Y, Miyamoto T, Sengoku K, Azuma H, Tanahashi Y, Ito Y, Kobayashi S, Minatoya M, Bamai YA, Yamazaki K, Itoh S, Miyashita C, Araki A, Kishi R. Population Attributable Fractions of Modifiable Risk Factors for Nonsyndromic Orofacial Clefts: A Prospective Cohort Study From the Japan Environment and Children’s Study. *J Epidemiol*. 2020; Online ahead of print
- Savitz DA, Schwingl PJ, Keels MA. Influence of Paternal Age, Smoking, and Alcohol Consumption on Congenital Anomalies. *Teratology* 1991;44:429–440.
- Shaw GM, Wasserman CR, Lammer EJ, O’Malley CD, Murray JC, Basart AM, Tolarova MM. Orofacial Clefts, Parental Cigarette Smoking, and Transforming Growth Factor-Alpha Gene Variants. *Am J Hum Genet*. 1996;58:551–561.
- Shi M, Christensen K, Weinberg CR, Romitti P, Bathum L, Lozada A, Morris RW, Lovett M, Murray JC. Orofacial Cleft Risk Is Increased with Maternal Smoking and Specific Detoxification-Gene Variants. *Am J Hum Genet*. 2007;80:76–90.
- Shiono PH, Klebanoff MA, Berendes HW. Congenital Malformations and Maternal Smoking during Pregnancy. *Teratology*. 1986;34:65–71.
- Sterne JAC, Sutton AJ, Ioannidis JPA, Terrin N, Jones DR, Lau J, Carpenter J, Rucker G, Harbord RM, Schmid CH, Tetzlaff J, Deeks JJ, Peters J, Macaskill P, Schwarzer G, Duval S, Altman DG, Mohler D, Higgins JPT. Recommendations

for Examining and Interpreting Funnel Plot Asymmetry in Meta-Analyses of Randomised Controlled Trials. *BMJ*. 2011;343:d4002

Taylor AE, Richmond RC, Palviainen T, Loukola A, Wootton RE, Kaprio J, Relton CL, Smith GD, Munafò MR. The Effect of Body Mass Index on Smoking Behaviour and Nicotine Metabolism: A Mendelian Randomization Study. *Hum Mol Genet*. 2019;28:1322–1330.

Taylor M, Rode L, Bjørngaard J, Taylor AE, Bojesen SE, Asvold BO, Gabrielsen ME, Lewis G, Nordestgaard BG, Romundstad PR, Hickman M, Munafò MR. Is Smoking Heaviness Causally Associated with Alcohol Use? A Mendelian Randomization Study in Four European Cohorts. *Int J Epidemiol*. 2018;47:1098–1105.

The Central Intelligence Agency. The World Factbook. Available at: <https://www.cia.gov/the-world-factbook/>. Accessed February 9, 2021.

United States Department of Health and Human Services. The Health Consequences of Smoking—50 Years of Progress. A Report of the Surgeon General. 2014. Atlanta, GA. United States Department of Health and Human Services, National Center for Chronic Disease Prevention and Health Promotion, Office on Smoking and Health.

Van Den Eeden SK, Karagas MR, Daling JR, Vaughan TL. A Case-control Study of Maternal Smoking and Congenital Malformations. *Paediatr Perinat Epidemiol*. 1990;4:147-155

Vieira AR. Unraveling Human Cleft Lip and Palate Research. *J Dent Res*. 2008;87:119-125

Vieira AR., Dattilo S. Oxygen, Left/Right Asymmetry, and Cleft Lip and Palate. *J Craniofac Surg*. 2018;29:396–399.

- Wehby G, Jugessur A, Murray JC, Moreno LM, Wilcox A, Lie RT. Genes as Instruments for Studying Risk Behavior Effects: An Application to Maternal Smoking and Orofacial Clefts. *Health Serv Outcomes Res Methodol.* 2011;11:54–78.
- Wells G, Shea B, O’Connell D, Pterson J, Welch V, Losos M, Tugwell P. The Newcastle-Ottawa Scale (NOS) for Assessing the Quality of Nonrandomised Studies in Meta-Analyses. Available at: [http://www.ohri.ca/programs/clinical\\_epidemiology/oxford.asp](http://www.ohri.ca/programs/clinical_epidemiology/oxford.asp). Accessed February 9, 2021
- World Health Organisation. WHO Recommendations for the Prevention and Management of Tobacco Use and Second-Hand Smoke Exposure in Pregnancy. World Health Organisation; 2013 ISBN 978 92 4 150607 6
- Woods SE, Raju U. Maternal Smoking and the Risk of Congenital Birth Defects: A Cohort Study. *J Am Board Fam Pract.* 2001;14:330–334.
- World Health Organisation. Tobacco. Available at: <https://www.who.int/health-topics/tobacco/>. Accessed February 9, 2021.
- Wyszynski DF, Duffy DL, Beaty TH. Maternal Cigarette Smoking and Oral Clefts: A Meta-Analysis. *Cleft Palate Craniofac J.* 1997;34:206–210.
- Wyszynski DF, Wu T. Use of U.S. Birth Certificate Data to Estimate the Risk of Maternal Cigarette Smoking for Oral Clefting. *Cleft Palate Craniofac J.* 2002;39:188–192.
- Xu D, Qu WD, Sun C, Cao RY, Liu DW, Du PG. A Study on Environmental Factors for Nonsyndromic Cleft Lip and/or Palate. *J Craniofac Surg.* 2018;29:364–367.
- Xuan Z, Zhongpeng Y, Yanjun G, Jiaqi D, Yuchi Z, Bing S, Chenghao L. Maternal

Active Smoking and Risk of Oral Clefts: A Meta-Analysis. *Oral Surg Oral Med Oral Pathol Oral Radiol.* 2016;122:680–690.

Zhang B, Jiao X, Mao L, Xue J. Maternal Cigarette Smoking and the Associated Risk of Having a Child with Orofacial Clefts in China: A Case-Control Study. *J CranioMaxillofac Surg.* 2011;39:313–318.

## Figure Legends

**Figure 1:** A flow chart of the search strategy and study selection

**Figure 2:** Forest plot to display the measures of effect for studies reporting cleft lip and/or palate outcome. The overall effect has been calculated using a fixed effects method.

**Figure 3:** Forest plot to display the measures of effect for studies reporting cleft lip  $\pm$  palate outcome. The overall effect has been calculated using a fixed effects method.

**Figure 4:** Forest plot to display the measures of effect for studies reporting cleft palate only outcome. The overall effect has been calculated using a random effects method.

**Figure 5:** A subgroup forest plot to display the dose-response effect of smoking on cleft lip and/or palate outcome. The overall effect for each of the three dose



categories (1-10, 11-20 and >20) has been calculated using a random effects model

## **Supplementary Figure Legends**

**Supplementary Figure 1:** Medline search strategy

**Supplementary Figure 2:** Embase search strategy

**Supplementary Figure 3:** Web of Science search strategy

**Supplementary Figure 4:** Cochrane search strategy

**Supplementary Figure 2:** Funnel plots to test publication bias for studies included in this review. The studies have been categorized depending the outcome reported: A) Cleft lip and/or palate; B) Cleft lip  $\pm$  palate; C) Cleft Palate Only

**Supplementary Figure 6:** Forest plot to display the individual study measures of effect and pooled analysis for all studies included in this review reporting cleft lip and/or palate outcome.

**Supplementary Figure 7:** Forest plot to display the individual study measures of effect and pooled analysis for all studies included in this review reporting cleft lip  $\pm$  palate outcome.

**Supplementary Figure 8:** Forest plot to display the individual study measures of effect and pooled analysis for all studies included in this review reporting cleft palate only outcome.

**Table 1: Characteristics of Included Studies**

| Author                | Year | Country | Period    | Sample details                                                                  | Control details                                                          | No. of cases (proportion exposed) | No. of controls (proportion exposed) | Period of smoking | Effect of smoking dose | Outcome     |
|-----------------------|------|---------|-----------|---------------------------------------------------------------------------------|--------------------------------------------------------------------------|-----------------------------------|--------------------------------------|-------------------|------------------------|-------------|
| <b>Cohort Studies</b> |      |         |           |                                                                                 |                                                                          |                                   |                                      |                   |                        |             |
| Shiono et al.         | 1986 | USA     | 1974-1977 | 13 Northern California Kaiser Clinics                                           | Births with no congenital deformity                                      | 56 (27%)                          | NS                                   | T1                | No                     | CL±P and CP |
| Malloy et al.         | 1989 | USA     | 1980-1983 | Missouri Centre for Health Statistics Multisource Birth Defects Registry        | NS                                                                       | 451 (NS)                          | 288067 (NS)                          | T1-3              | No                     | CL/P        |
| McDonald et al.       | 1992 | USA     | 1982-1984 | Survey in Montreal                                                              | Births matched to location and date                                      | 96 (39%)                          | 89317 (33%)                          | T1                | Yes                    | CL/P        |
| Kallen                | 1997 | Sweden  | 1983-1992 | The Swedish Registry of Congenital Malformations and the Medical Birth Registry | Births with non-cleft congenital deformities                             | 1634 (31%)                        | 1002742 (27%)                        | T1                | No                     | CL±P and CP |
| Woods et al.          | 2001 | USA     | 1998-1999 | The TriHealth Hospitals in Cincinnati                                           | Births with and without non-cleft congenital birth defects               | 7 (14%)                           | 18076 (11%)                          | T1-3              | No                     | CL/P        |
| DeRoo et al.          | 2003 | USA     | 1987-1990 | Washington State Birth Defects Registry (BDR)                                   | Birth with non-cleft congenital deformities matched to location and date | 608 (23%)                         | 297530 (21%)                         | T1                | No                     | CL±P and CP |

|                             |      |         |           |                                                                 |                                                          |            |              |      |     |                   |
|-----------------------------|------|---------|-----------|-----------------------------------------------------------------|----------------------------------------------------------|------------|--------------|------|-----|-------------------|
| Bille et al.                | 2007 | Denmark | 1997-2003 | The Danish National Birth Cohort                                | Non-cleft births                                         | 192 (32%)  | 880 (25%)    | T1   | Yes | CL/P, CL±P and CP |
| Lebby et al.                | 2010 | USA     | 2005      | US Natality Database                                            | Births without a congenital deformity                    | 1654 (18%) | 1654 (10%)   | T1-3 | No  | CL/P              |
| Gunnerbeck et al.           | 2014 | Sweden  | 1999-2009 | Swedish Medical Birth Register                                  | Non-cleft births                                         | 1985 (10%) | 1086213 (8%) | P    | No  | CL/P              |
| Leite et al.                | 2014 | Denmark | 1997-2010 | Danish Medical Birth Register                                   | Non-cleft births                                         | 1564 (23%) | 838265 (19%) | T1   | No  | CL±P and CP       |
| Sato et al.                 | 2020 | Japan   | 2011-2014 | Japan Environment and Children's Study                          | Non-cleft births                                         | 146 (16%)  | 94174 (13%)  | T1   | No  | CL±P              |
| <b>Case-Control Studies</b> |      |         |           |                                                                 |                                                          |            |              |      |     |                   |
| Khoury et al. (             | 1989 | USA     | 1968-1980 | Atlanta Birth Defects Case-Control Study                        | Births matched to location and date                      | 345 (41%)  | 2809 (NS)    | P    | Yes | CL±P and CP       |
| Van Den Eeden et al.        | 1990 | USA     | 1984-1986 | Washington State Birth Records                                  | Births without a congenital malformation matched to date | 173 (NS)   | 4500 (23%)   | T1-3 | NS  | CL±P and CP       |
| Hwang et al.                | 1995 | USA     | 1984-1992 | Maryland Birth Defects Reporting and Information System (BDRIS) | Births with non-cleft congenital deformities             | 183 (37%)  | 284 (29%)    | T1-3 | No  | CL±P and CP       |
| Shaw et al.                 | 1996 | USA     | 1987-1989 | California Birth Defects Monitoring Programme                   | Births matched to location and date                      | 731 (32%)  | 734 (23%)    | P    | Yes | CLP and CPO       |
| Lieff et al.                | 1999 | USA     | 1976-1992 | Slone Epidemiology Unit Birth Defects Study                     | Births with non-cleft congenital deformities             | 1072 (36%) | 2295 (30%)   | T1-3 | Yes | CL, CL±P and CP   |

|                  |      |                                     |                   |                                                                                                                                 |                                                                         |            |              |      |     |                   |
|------------------|------|-------------------------------------|-------------------|---------------------------------------------------------------------------------------------------------------------------------|-------------------------------------------------------------------------|------------|--------------|------|-----|-------------------|
| Lorente et al.   | 2000 | France / UK / Italy and Netherlands | 1989-1992         | European Registration of Congenital Anomalies                                                                                   | Consecutive births or births matched to location and date               | 133 (37%)  | 1134 (NS)    | T1   | Yes | CL±P and CP       |
| Chung et al.     | 2000 | USA                                 | 1996              | US Natality Database                                                                                                            | Births without a congenital malformation                                | 2207 (21%) | 4414 (15%)   | T1-3 | Yes | CL/P              |
| Beaty et al.     | 2001 | USA                                 | 1992-1998         | The Maryland Birth Defects Reporting and Information System (BDRIS) and the Children's National Medical Centre in Washington DC | Births without a congenital deformity identified from clinical settings | 135 (20%)  | 152 (14%)    | P    | No  | CL±P and CP       |
| Wyszynski and Wu | 2002 | USA                                 | 1997              | US Natality Database                                                                                                            | Births without congenital deformities                                   | 2029 (19%) | 4050 (17%)   | T1-3 | Yes | CL/P              |
| Little et al.    | 2004 | UK                                  | 1997-2000         | UK Cleft Teams                                                                                                                  | Non-cleft births                                                        | 190 (42%)  | 248 (24%)    | T1   | Yes | CL±P and CP       |
| Meyer et al.     | 2004 | Sweden                              | 1983-1997         | Swedish Medical Birth Registry                                                                                                  | Non-cleft births                                                        | 1853 (30%) | 128688 (24%) | T1   | YEs | CL±P and CP       |
| Krapels et al.   | 2006 | Netherlands                         | 1998-2003         | Netherlands Cleft Teams                                                                                                         | Births without a congenital malformation                                | 350 (25%)  | 222 (23%)    | P    | Yes | CL±P and CP       |
| Shi et al.(A)    | 2007 | Denmark                             | 1991 - 1994 (DBS) | Danish Case-Control study (DBS)                                                                                                 | Non-cleft birth recruited from same hospital as case mother             | 270 (40%)  | 485 (32%)    | P    | Yes | CL±P and CP       |
| Shi et al.(B)    | 2007 | USA                                 | 1987-2001         | Iowa Registry for Congenital and Inherited Disorders                                                                            | Births without congenital deformities matched                           | 379 (27%)  | 397 (20%)    | P    | Yes | CL/P, CL±P and CP |

|                     |      |        |            |                                                    | by sex and date                                                                 |           |           |       |     |                 |
|---------------------|------|--------|------------|----------------------------------------------------|---------------------------------------------------------------------------------|-----------|-----------|-------|-----|-----------------|
| Grewal et al.       | 2008 | USA    | 1999-2003  | Hospital reports in California                     | Births without congenital deformity recruited from same hospital as case mother | 701 (9%)  | 700 (18%) | P     | Yes | CL±P and CP     |
| Lie et al.          | 2008 | Norway | 1996-2001  | Norway Cleft Teams                                 | Non-cleft births                                                                | 573 (42%) | 763 (32%) | T1    | Yes | CL±P and CP     |
| Chevrier et al.     | 2008 | France | 1998-2001  | 7 French Hospitals                                 | Births without congenital deformity recruited from same hospital as case mother | 240 (28%) | 236 (29%) | T1    | Yes | CL±P and CP     |
| Leite and Koifman   | 2009 | Brazil | Not stated | Nossa Senhora de Loreto Municipal Hospital, Brazil | Births without congenital deformity recruited from same hospital as case mother | 274 (19%) | 548 (16%) | T1    | Yes | CL/P            |
| Mirilas et al.      | 2011 | Greece | 2004-2009  | Single Greek Hospital                              | Non-cleft children presenting to the hospital surgical department               | 35 (17%)  | 35 (20%)  | T1    | No  | CL/P            |
| Zhang et al.        | 2011 | China  | 2006-2009  | University of Harbin Medical University, China     | Births without congenital deformity recruited from same hospital as case mother | 304 (5%)  | 453 (1%)  | P +T1 | Yes | CL, CL±P and CP |
| Ibarra-Lopez et al. | 2013 | Mexico | not stated | 2 hospitals in Mexico                              | Non-cleft children presenting to the involved hospitals                         | 88 (1%)   | 116 (7%)  | T1    | No  | CL/P            |

|                      |      |                                        |           |                                        |                                                                                 |           |           |      |    |                   |
|----------------------|------|----------------------------------------|-----------|----------------------------------------|---------------------------------------------------------------------------------|-----------|-----------|------|----|-------------------|
| Salihu et al.        | 2014 | Kosovo                                 | 1996-2005 | NS                                     | NS                                                                              | 244 (NS)  | 488 (NS)  | T1-3 | No | CL/P              |
| Bezerra et al.       | 2015 | Brazil                                 |           | 2 hospitals in Brazil                  | Non-cleft children recruited from schools                                       | 140 (14%) | 175 (13%) | T1   |    | CL/P              |
| Hao et al.           | 2015 | China                                  | 2009-2014 | 3 hospital sites in China              | Births without congenital deformity recruited from same hospital as case mother | 499 (7%)  | 480 (6%)  | T1-3 | No | CL±P and CP       |
| Martelli et al.      | 2015 | Brazil                                 | 2009-2012 | Single hospital in Brazil              | Births without congenital deformity recruited from same hospital as case mother | 843 (25%) | 676 (14%) | T1   | No | CL/P, CL±P and CP |
| Figueiredo et al.    | 2015 | DRC, Vietnam, Philippines and Honduras | 2009-2014 | Operation Smile International Missions | Births without congenital deformity recruited from same hospital as case mother | 430 (1%)  | 754 (<1%) | T1   | No | CL/P              |
| Ebadifar et al.      | 2016 | Iran                                   | 2013-2015 | Single center in Iran                  | Non-cleft children from Iran                                                    | 105 (39%) | 218 (2%)  | T1   | No | CL/P              |
| Liu et al.           | 2016 | China                                  | 2002-2014 | Shanxi Province, China                 | NS                                                                              | 205 (<1%) | 1223 (2%) | P    | No | CL/P              |
| Angulo-Castro et al. | 2017 | Mexico                                 | 2010-2015 | Single hospital in Mexico              | Non-cleft births recruited from same hospital as case mother                    | 24 (46%)  | 24 (13%)  | T1-3 | No | CL/P              |
| Xu et al.            | 2018 | China                                  | 2013-2016 | Single hospital in China               | Children with frenulum                                                          | 236 (21%) | 209 (6%)  | T1-3 | No | CL/P              |

|                     |      |                                                                                            |               |                                              | abnormality<br>recruited from same<br>hospital                                       |            |             |      |    |                  |
|---------------------|------|--------------------------------------------------------------------------------------------|---------------|----------------------------------------------|--------------------------------------------------------------------------------------|------------|-------------|------|----|------------------|
| Raut et al.         | 2019 | USA                                                                                        | 1997-<br>2011 | National Birth Defects<br>Prevention Study   | Births without<br>congenital<br>deformities                                          | 4003 (23%) | 11395 (18%) | P    | No | CL±P<br>and CP   |
| Acs et al.          | 2020 | Hungary                                                                                    | 1980-<br>2009 | Hungarian Congenital<br>Abnormality Registry | Births without<br>congenital<br>deformities                                          | 751 (19%)  | 1196 (8%)   | T1   | No | CP               |
| Regina et<br>al.    | 2020 | Brazil                                                                                     | 2012-<br>2014 | Cleft unit at Brazilian<br>Hospital          | Births without<br>congenital<br>deformities                                          | 150 (9%)   | 300 (5%)    | T1-3 | No | CL/P             |
| Ausländer<br>et al. | 2020 | Vietnam,<br>Philippines,<br>Honduras,<br>Nicaragua,<br>Morocco,<br>Congo and<br>Madagascar | 2012-<br>2017 | Operation Smile<br>Internatinal Missions     | Births without<br>congenital<br>deformities recruited<br>from surrounding<br>regions | 2137 (<1%) | 2014 (<1%)  | T1-3 | No | CL/P and<br>CL±P |

1

<sup>1</sup> Abbreviations: CL (Cleft Lip Only); CL/P (Cleft Lip and/or Cleft Palate); CL±P (Cleft Lip ± Palate); CP (Cleft Palate Only); NS (Not Stated); P (Peri-Conceptual); T1 (First Trimester); T1-3 (Anytime During Pregnancy).



**Table 2: Quality Assessment of Included Studies using the Newcastle Ottawa Scale.**

| <b>Author</b>               | <b>Year</b> |                  |                      |                 | <b>Quality Score</b> |
|-----------------------------|-------------|------------------|----------------------|-----------------|----------------------|
| <b>Cohort Studies</b>       |             | <b>Selection</b> | <b>Comparability</b> | <b>Outcome</b>  |                      |
| Shiono et al.               | 1986        | ★★★              | ★                    | ★★★             | Fair                 |
| Malloy et al.               | 1989        | ★★               |                      | ★★              | Poor                 |
| McDonald et al.             | 1992        | ★★★              | ★                    | ★★              | Fair                 |
| Kallen                      | 1997        | ★★★★             |                      | ★★★             | Poor                 |
| Woods et al.                | 2001        | ★★★★             |                      | ★★              | Poor                 |
| DeRoo et al.                | 2003        | ★★               |                      | ★★★             | Poor                 |
| Bille et al.                | 2007        | ★★★★             | ★                    | ★★★             | Fair                 |
| Lebby et al.                | 2010        | ★★★              | ★                    | ★★              | Fair                 |
| Gunnerbeck et al.           | 2014        | ★★★★             |                      | ★★★             | Poor                 |
| Leite et al.                | 2014        | ★★★★             |                      | ★★★             | Poor                 |
| Sato et al.                 | 2020        | ★★★              | ★★                   | ★★★             | Good                 |
| <b>Case-Control Studies</b> |             | <b>Selection</b> | <b>Comparability</b> | <b>Exposure</b> |                      |
| Khoury et al.               | 1989        | ★★★★             | ★                    | ★               | Poor                 |
| Van Den Eeden et al.        | 1990        | ★★★              | ★                    | ★★              | Fair                 |
| Hwang et al.                | 1995        | ★                |                      | ★               | Poor                 |
| Shaw et al.                 | 1996        | ★★★★             | ★                    | ★★★             | Fair                 |
| Lieff et al.                | 1999        | ★★               |                      | ★★              | Poor                 |
| Lorente et al.              | 2000        | ★                | ★                    | ★               | Poor                 |
| Chung et al.                | 2000        | ★★★              | ★                    | ★★              | Fair                 |
| Beaty et al.                | 2001        | ★★               | ★                    | ★               | Poor                 |
| Wyszynski and Wu            | 2002        | ★★★              | ★                    | ★★              | Fair                 |
| Little et al.               | 2004        | ★★               |                      | ★★              | Poor                 |
| Meyer et al.                | 2004        | ★★★              |                      | ★★★             | Poor                 |
| Krapels et al.              | 2006        | ★★               |                      | ★               | Poor                 |
| Shi et al.(A)               | 2007        | ★                |                      | ★★              | Poor                 |
| Shi et al.(B)               | 2007        | ★★★★             | ★                    | ★               | Poor                 |
| Grewal et al.               | 2008        | ★★★★             | ★★                   | ★★              | Good                 |
| Lie et al.                  | 2008        | ★★★★             | ★                    | ★★              | Fair                 |
| Chevrier et al.             | 2008        | ★★               | ★                    | ★★              | Fair                 |
| Leite and Koifman           | 2009        | ★★               | ★                    | ★               | Poor                 |
| Mirilas et al.              | 2011        | ★★               |                      | ★               | Poor                 |
| Zhang et al.                | 2011        | ★★               | ★                    | ★               | Poor                 |
| Ibarra-Lopez et al.         | 2013        | ★★               |                      | ★               | Poor                 |
| Salihu et al.               | 2014        |                  |                      |                 | Poor                 |
| Bezerra et al.              | 2015        | ★★★              |                      | ★               | Poor                 |
| Hao et al.                  | 2015        | ★                | ★                    | ★               | Poor                 |
| Martelli et al.             | 2015        | ★★               |                      | ★               | Poor                 |
| Figueiredo et al.           | 2015        | ★★               |                      | ★               | Poor                 |
| Ebadifar et al.             | 2016        | ★★               |                      | ★               | Poor                 |
| Liu et al.                  | 2016        | ★                |                      | ★★              | Poor                 |
| Angulo-Castro et al.        | 2017        | ★                |                      | ★               | Poor                 |
| Xu et al.                   | 2018        | ★★               | ★                    | ★★              | Fair                 |

|                  |      |      |    |     |      |
|------------------|------|------|----|-----|------|
| Raut et al.      | 2019 | ★★★★ | ★★ | ★★★ | Good |
| Acs et al.       | 2020 | ★★★★ | ★  | ★★  | Fair |
| Regina et al     | 2020 | ★★   |    | ★   | Poor |
| Ausländer et al. | 2020 | ★★   | ★★ | ★★  | Fair |

1

---

<sup>1</sup> Good quality: 3 or 4 stars (★) in selection domain AND 2 stars in comparability domain AND 2 or 3 stars in outcome/exposure domain; Fair quality: 2 stars in selection domain AND 1 or 2 stars in comparability domain AND 2 or 3 stars in outcome/exposure domain; Poor quality: 0 or 1 star in selection domain OR 0 stars in comparability domain OR 0 or 1 stars in outcome/exposure domain.

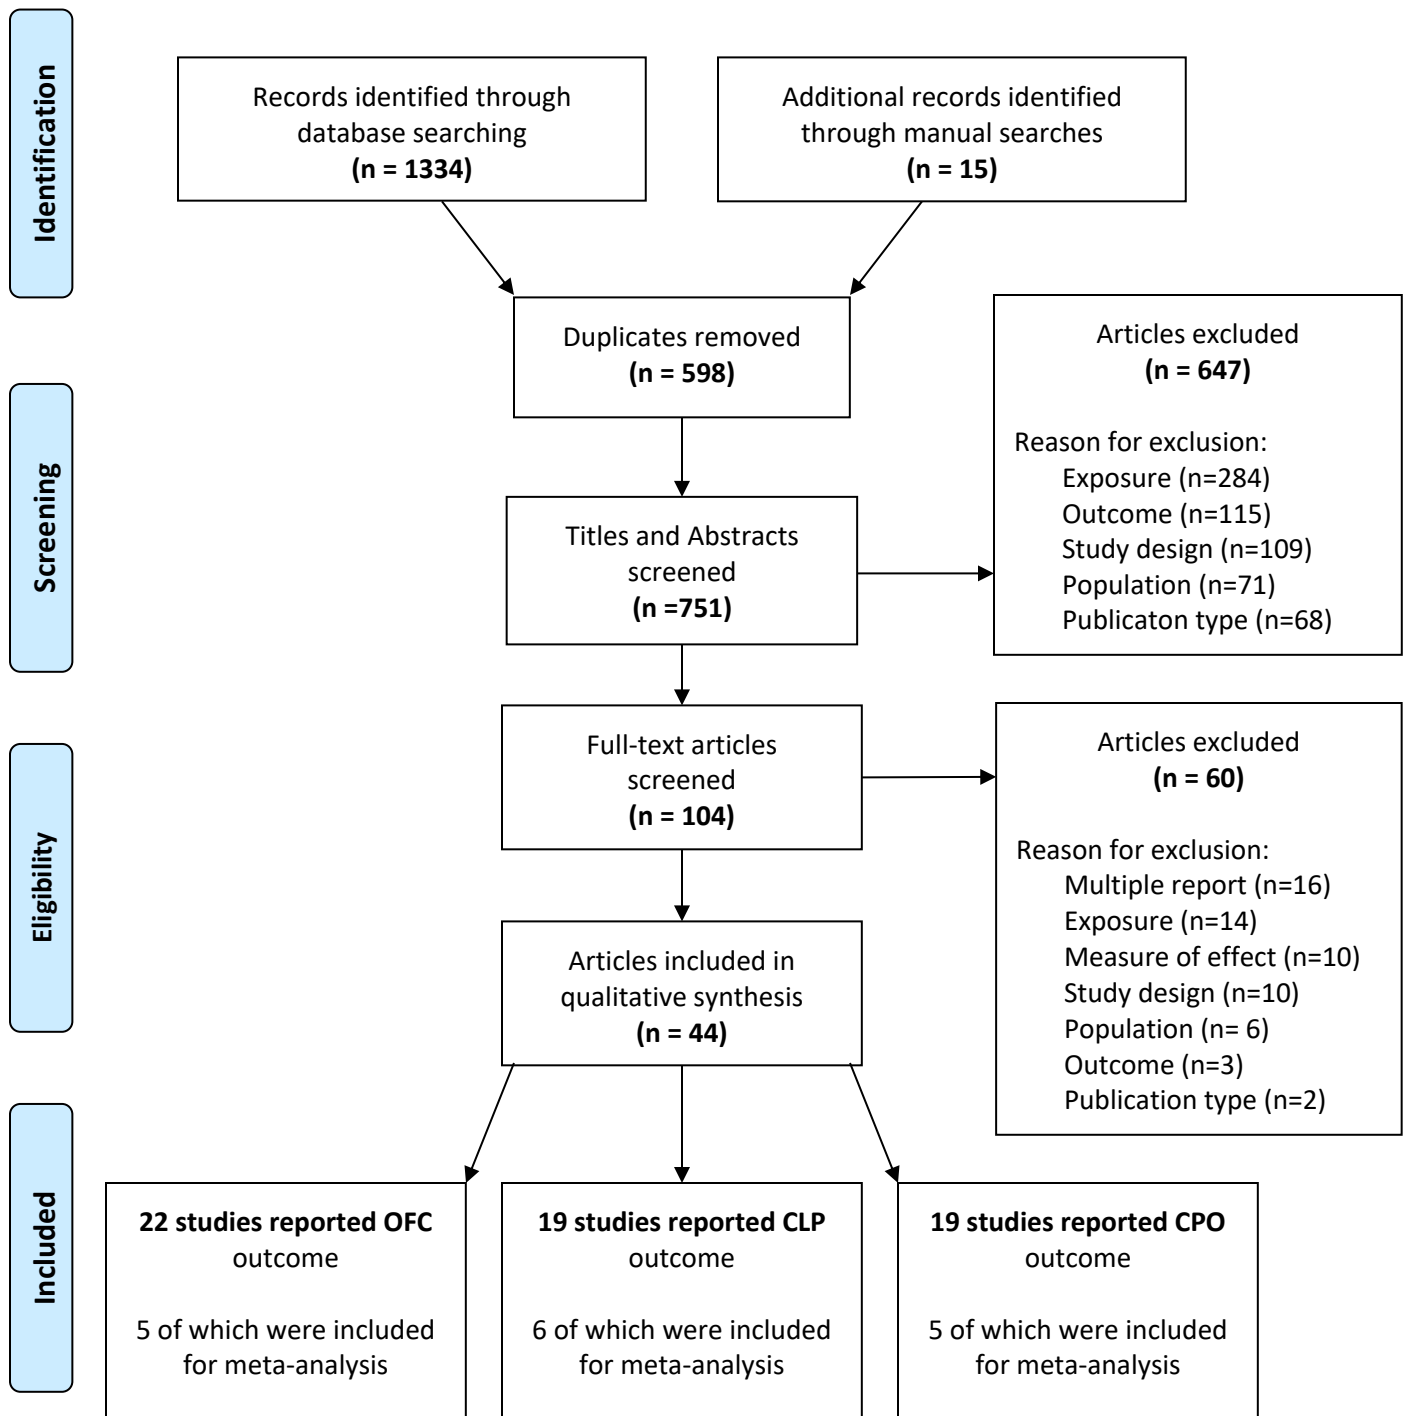

**Study**

Chung et al. 2000  
Bille et al. 2007  
Lebby et al. 2010  
Xu et al. 2018  
Auslander et al. 2020

**Overall effect**

Heterogeneity:  $I^2 = 27\%$ ,  $p = 0.24$

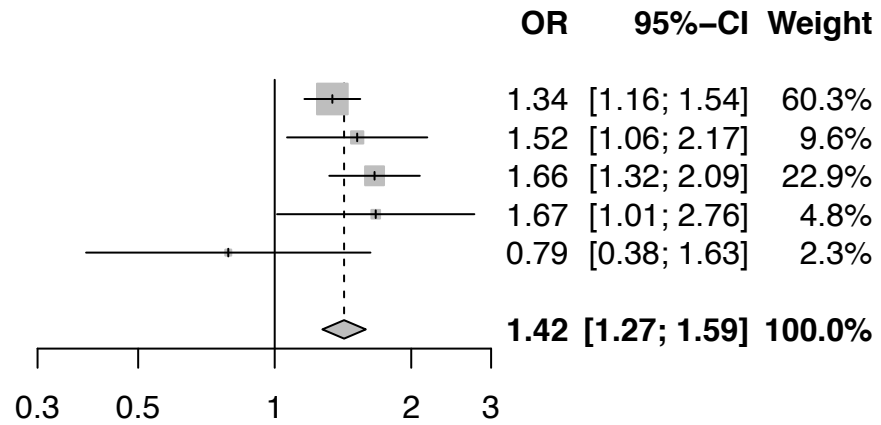

**Study**

Shiono et al. 1986  
Van Den Eeden et al. 1990  
Bille et al. 2007  
Raut et al. 2019  
Sato et al. 2020  
Auslander et al. 2020

**Overall effect**

Heterogeneity:  $I^2 = 0\%$ ,  $p = 0.67$

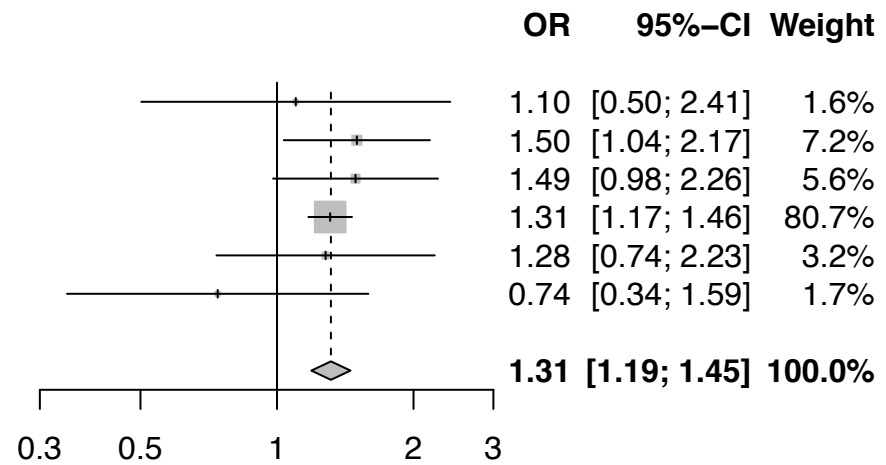

**Study**

Shiono et al. 1986  
Van Den Eeden et al. 1990  
Bille et al. 2007  
Raut et al. 2019  
Acs et al. 2020

**Overall effect**

Heterogeneity:  $I^2 = 81\%$ ,  $p < 0.01$

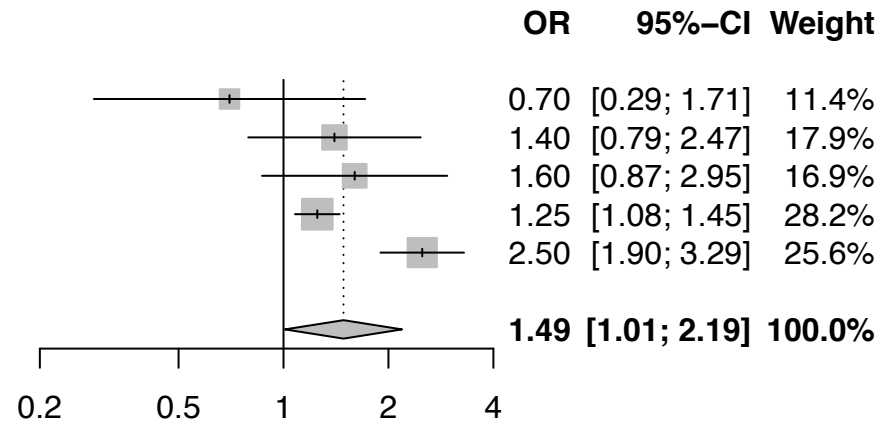

## Number of cigarettes smoked per day

OR 95%-CI

### 1-10

McDonald et al. 1992

1.17 [0.57; 2.39]

Chung et al. 2000

1.32 [1.11; 1.56]

Wyszynski and Wu 2002

1.10 [0.93; 1.30]

Bille et al. 2007

1.28 [0.85; 1.93]

Chevrier et al. 2008

1.10 [0.67; 1.81]

#### Random effects model

**1.20 [1.06; 1.36]**

$I^2 = 0\%$  [0%; 66%],  $\chi^2_4 = 2.47$  ( $p = 0.65$ )

### 11-20

McDonald et al. 1992

1.04 [0.51; 2.13]

Chung et al. 2000

1.28 [1.01; 1.63]

Wyszynski and Wu 2002

1.11 [0.87; 1.41]

Bille et al. 2007

0.92 [0.45; 1.87]

Chevrier et al. 2008

1.00 [0.50; 2.00]

#### Random effects model

**1.15 [0.97; 1.37]**

$I^2 = 0\%$  [0%; 43%],  $\chi^2_4 = 1.46$  ( $p = 0.83$ )

### 20 and above

McDonald et al. 1992

1.09 [0.61; 1.94]

Chung et al. 2000

1.69 [1.14; 2.50]

Wyszynski and Wu 2002

1.55 [0.88; 2.71]

Bille et al. 2007

2.27 [0.40; 12.84]

Chevrier et al. 2008

1.00 [0.30; 3.32]

#### Random effects model

**1.45 [1.05; 2.00]**

$I^2 = 0\%$  [0%; 62%],  $\chi^2_4 = 2.19$  ( $p = 0.70$ )

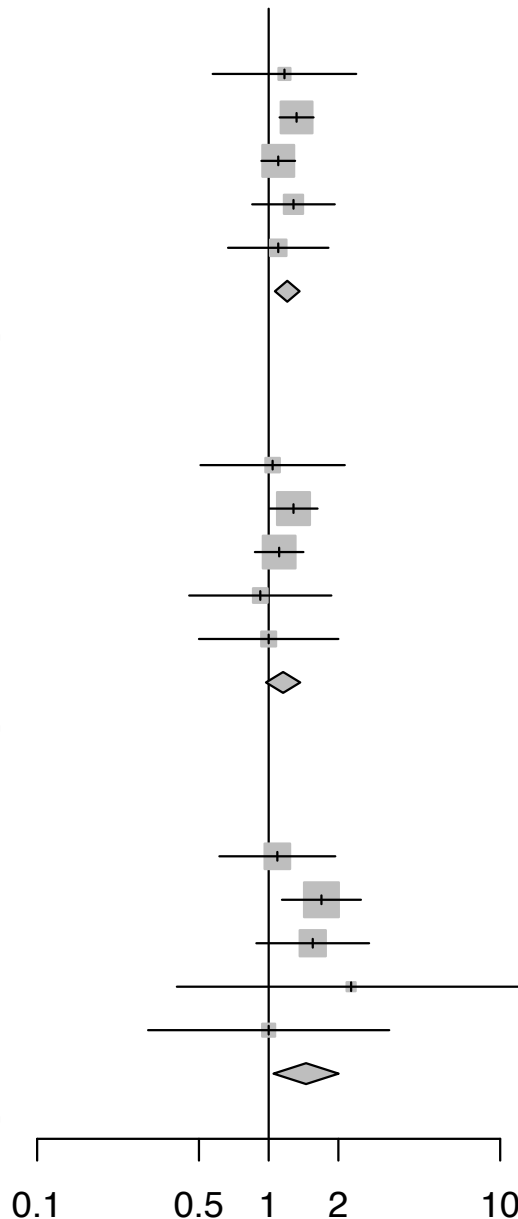

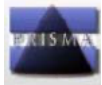

# Supplementary Table 1: PRISMA 2009 Checklist for the systematic review and meta-analysis

| Section/topic             | #  | Checklist item                                                                                                                                                                                                                                                                                              | Reported on page # |
|---------------------------|----|-------------------------------------------------------------------------------------------------------------------------------------------------------------------------------------------------------------------------------------------------------------------------------------------------------------|--------------------|
| <b>TITLE</b>              |    |                                                                                                                                                                                                                                                                                                             |                    |
| Title                     | 1  | Identify the report as a systematic review, meta-analysis, or both.                                                                                                                                                                                                                                         | 1                  |
| <b>ABSTRACT</b>           |    |                                                                                                                                                                                                                                                                                                             |                    |
| Structured summary        | 2  | Provide a structured summary including, as applicable: background; objectives; data sources; study eligibility criteria, participants, and interventions; study appraisal and synthesis methods; results; limitations; conclusions and implications of key findings; systematic review registration number. | 3                  |
| <b>INTRODUCTION</b>       |    |                                                                                                                                                                                                                                                                                                             |                    |
| Rationale                 | 3  | Describe the rationale for the review in the context of what is already known.                                                                                                                                                                                                                              | 5                  |
| Objectives                | 4  | Provide an explicit statement of questions being addressed with reference to participants, interventions, comparisons, outcomes, and study design (PICOS).                                                                                                                                                  | Suppl. Table 2     |
| <b>METHODS</b>            |    |                                                                                                                                                                                                                                                                                                             |                    |
| Protocol and registration | 5  | Indicate if a review protocol exists, if and where it can be accessed (e.g., Web address), and, if available, provide registration information including registration number.                                                                                                                               | 5                  |
| Eligibility criteria      | 6  | Specify study characteristics (e.g., PICOS, length of follow-up) and report characteristics (e.g., years considered, language, publication status) used as criteria for eligibility, giving rationale.                                                                                                      | 6                  |
| Information sources       | 7  | Describe all information sources (e.g., databases with dates of coverage, contact with study authors to identify additional studies) in the search and date last searched.                                                                                                                                  | 7                  |
| Search                    | 8  | Present full electronic search strategy for at least one database, including any limits used, such that it could be repeated.                                                                                                                                                                               | Suppl. Figures 1-4 |
| Study selection           | 9  | State the process for selecting studies (i.e., screening, eligibility, included in systematic review, and, if applicable, included in the meta-analysis).                                                                                                                                                   | 7                  |
| Data collection process   | 10 | Describe method of data extraction from reports (e.g., piloted forms, independently, in duplicate) and any processes for obtaining and confirming data from investigators.                                                                                                                                  | 8                  |
| Data items                | 11 | List and define all variables for which data were sought (e.g., PICOS, funding sources) and any assumptions and simplifications made.                                                                                                                                                                       | 8                  |





# Supplementary Table 1: PRISMA 2009 Checklist for the systematic review and meta-analysis

|                                    |    |                                                                                                                                                                                                                        |   |
|------------------------------------|----|------------------------------------------------------------------------------------------------------------------------------------------------------------------------------------------------------------------------|---|
| Risk of bias in individual studies | 12 | Describe methods used for assessing risk of bias of individual studies (including specification of whether this was done at the study or outcome level), and how this information is to be used in any data synthesis. | 8 |
| Summary measures                   | 13 | State the principal summary measures (e.g., risk ratio, difference in means).                                                                                                                                          | 9 |
| Synthesis of results               | 14 | Describe the methods of handling data and combining results of studies, if done, including measures of consistency (e.g., $I^2$ ) for each meta-analysis.                                                              | 9 |

Page 1 of 2

| Section/topic                 | #  | Checklist item                                                                                                                                                                                           | Reported on page #             |
|-------------------------------|----|----------------------------------------------------------------------------------------------------------------------------------------------------------------------------------------------------------|--------------------------------|
| Risk of bias across studies   | 15 | Specify any assessment of risk of bias that may affect the cumulative evidence (e.g., publication bias, selective reporting within studies).                                                             | 9                              |
| Additional analyses           | 16 | Describe methods of additional analyses (e.g., sensitivity or subgroup analyses, meta-regression), if done, indicating which were pre-specified.                                                         | 9                              |
| <b>RESULTS</b>                |    |                                                                                                                                                                                                          |                                |
| Study selection               | 17 | Give numbers of studies screened, assessed for eligibility, and included in the review, with reasons for exclusions at each stage, ideally with a flow diagram.                                          | 10                             |
| Study characteristics         | 18 | For each study, present characteristics for which data were extracted (e.g., study size, PICOS, follow-up period) and provide the citations.                                                             | Table 1                        |
| Risk of bias within studies   | 19 | Present data on risk of bias of each study and, if available, any outcome level assessment (see item 12).                                                                                                | 11                             |
| Results of individual studies | 20 | For all outcomes considered (benefits or harms), present, for each study: (a) simple summary data for each intervention group (b) effect estimates and confidence intervals, ideally with a forest plot. | Figures 2-4                    |
| Synthesis of results          | 21 | Present results of each meta-analysis done, including confidence intervals and measures of consistency.                                                                                                  | Figures and Suppl. Figures 6-8 |
| Risk of bias across studies   | 22 | Present results of any assessment of risk of bias across studies (see Item 15).                                                                                                                          | Table 2                        |
| Additional analysis           | 23 | Give results of additional analyses, if done (e.g., sensitivity or subgroup analyses, meta-regression [see Item 16]).                                                                                    | Figure 5                       |
| <b>DISCUSSION</b>             |    |                                                                                                                                                                                                          |                                |



# Supplementary Table 1: PRISMA 2009 Checklist for the systematic review and meta-analysis

|                     |    |                                                                                                                                                                                      |            |
|---------------------|----|--------------------------------------------------------------------------------------------------------------------------------------------------------------------------------------|------------|
| Summary of evidence | 24 | Summarize the main findings including the strength of evidence for each main outcome; consider their relevance to key groups (e.g., healthcare providers, users, and policy makers). | 14         |
| Limitations         | 25 | Discuss limitations at study and outcome level (e.g., risk of bias), and at review-level (e.g., incomplete retrieval of identified research, reporting bias).                        | 16         |
| Conclusions         | 26 | Provide a general interpretation of the results in the context of other evidence, and implications for future research.                                                              | 17         |
| <b>FUNDING</b>      |    |                                                                                                                                                                                      |            |
| Funding             | 27 | Describe sources of funding for the systematic review and other support (e.g., supply of data); role of funders for the systematic review.                                           | Title Page |

From: Moher D, Liberati A, Tetzlaff J, Altman DG, The PRISMA Group (2009). Preferred Reporting Items for Systematic Reviews and Meta-Analyses: The PRISMA Statement. PLoS Med 6(6): e1000097. doi:10.1371/journal.pmed1000097

For more information, visit: [www.prisma-statement.org](http://www.prisma-statement.org).

## Supplementary Table 2: Criteria for including or excluding papers

| Include                                                                                                                                                                                                                                                                                                                                                                                                                                                                                                                                                                                                                                                                                                                                                                                                                                                                                                                                | Exclude                                                                                                                                                                                                                                                                                                                                                                                                                                                                                                                                                                                                                                                                                                                                                                                                                                                                                                                                                                                                                           |
|----------------------------------------------------------------------------------------------------------------------------------------------------------------------------------------------------------------------------------------------------------------------------------------------------------------------------------------------------------------------------------------------------------------------------------------------------------------------------------------------------------------------------------------------------------------------------------------------------------------------------------------------------------------------------------------------------------------------------------------------------------------------------------------------------------------------------------------------------------------------------------------------------------------------------------------|-----------------------------------------------------------------------------------------------------------------------------------------------------------------------------------------------------------------------------------------------------------------------------------------------------------------------------------------------------------------------------------------------------------------------------------------------------------------------------------------------------------------------------------------------------------------------------------------------------------------------------------------------------------------------------------------------------------------------------------------------------------------------------------------------------------------------------------------------------------------------------------------------------------------------------------------------------------------------------------------------------------------------------------|
| <p><b>1. Publication:</b> Full-text papers published in a peer-reviewed journal. All languages included</p> <p><b>2. Study:</b> Primary data using analytical study designs (comparing exposed versus unexposed groups). These may include cohort, case-control, RCT, quasi experimental, Mendelian Randomization studies, natural experiment and family based negative control designs</p> <p><b>3. Population:</b> Pregnant women or women who have given birth to live born children in the general population</p> <p><b>4. Exposure:</b> Active cigarette smoking in women during pregnancy measured either by self-reporting or by proxy measurements</p> <p><b>5. Outcome:</b> children born with an orofacial cleft. This includes cleft lip, cleft palate, cleft lip and palate and submucous cleft palate.</p> <p><b>6. Measures of effect:</b> A calculation made to define the association between exposure and outcome</p> | <p><b>1. Publication:</b> Title, abstract or conference proceedings only or published in a non-peer reviewed journal (book, newspaper, or website)</p> <p><b>2. Study:</b> Descriptive studies (i.e. no comparison between exposed and unexposed groups). Approaches to exclude will be case studies, case series, cross-sectional studies, expert opinion, letters and editorials).<br/>Secondary data from reviews</p> <p><b>3. Population:</b> Women who are not or have not been pregnant, partners/fathers and animal studies.</p> <p><b>4. Exposure:</b> Cigarette smoking before or after pregnancy but not explicitly during pregnancy. Intervention in study is not active cigarette smoking (i.e. cigar smoking, recreational drug smoking, vaping, passive/secondary smoking)</p> <p><b>5. Outcome:</b> Other offspring outcomes such as craniofacial abnormalities or developmental abnormalities</p> <p><b>6. Measures of effect:</b> No calculation made to define the association between exposure and outcome</p> |

**Supplementary Table 3:** The Assignment of Stars for Study Quality using the Newcastle Ottawa Scale

| Case Design                                     | Domain                 | Criteria                                                                                                      | Acceptable (Star Awarded)                                                                                                                                                | Unacceptable (Star not awarded)                                                            |
|-------------------------------------------------|------------------------|---------------------------------------------------------------------------------------------------------------|--------------------------------------------------------------------------------------------------------------------------------------------------------------------------|--------------------------------------------------------------------------------------------|
| <b>Cohort</b>                                   | Selection              | Representativeness of the exposed cohort                                                                      | Cohort represents or somewhat represents pregnant women in the general population                                                                                        | Selected group of pregnant women or no description of the derivation of the cohort         |
|                                                 |                        | Selection of the non-exposed cohort                                                                           | Pregnant women drawn from the same community as the exposed cohort                                                                                                       | Pregnant women drawn from a different source or no description                             |
|                                                 |                        | Ascertainment of exposure                                                                                     | Structured interview or secure record (such as birth certificate)                                                                                                        | Written self-report (i.e., survey) or no description                                       |
|                                                 |                        | Outcome of interest was not present at start of study                                                         | Demonstrated                                                                                                                                                             | Not demonstrated                                                                           |
|                                                 | Comparability          | Comparability of cohorts on the basis of the design or analysis                                               | Study controls for maternal age and maternal alcohol consumption (for 1 star) and additionally for maternal folic acid supplementation and body mass index (for 2 stars) | Major confounding factors not controlled for                                               |
|                                                 | Outcome                | Assessment of outcome                                                                                         | Orofacial cleft confirmed via record linkage or independent blind assessment                                                                                             | Orofacial cleft outcome confirmed by self-report or not stated                             |
| Was follow-up long enough for outcomes to occur |                        | An adequate follow-up period was allocated after the birth of the baby to make a diagnosis of orofacial cleft | The cohort did not allow for follow-up on birth outcomes                                                                                                                 |                                                                                            |
| <b>Case-Control</b>                             | Selection              | Adequacy of follow up of cohorts                                                                              | The follow up was >90% or a reasonable description for those lost to follow-up                                                                                           | The follow-up was <90% and no description for those lost to follow-up or not stated        |
|                                                 |                        | Is the case definition adequate?                                                                              | Diagnosis of cleft independently validated                                                                                                                               | Diagnosis of orofacial cleft made by record linkage alone or no description                |
|                                                 |                        | Representativeness of the cases                                                                               | All eligible cases of orofacial cleft over a defined period of time, in a defined catchment area or all cases from a treatment provider or a random sample taken         | Case group selected is not consecutive or has potential for biased selection or not stated |
|                                                 |                        | Selection of Controls                                                                                         | Controls in the study selected from the same population as the cases                                                                                                     | Controls derived from a hospitalised population or no description                          |
|                                                 | Definition of Controls | Controls verified to have no history of orofacial cleft                                                       | No description                                                                                                                                                           |                                                                                            |

|               |                                                                            |                                                                                                                                                                          |                                                                                    |
|---------------|----------------------------------------------------------------------------|--------------------------------------------------------------------------------------------------------------------------------------------------------------------------|------------------------------------------------------------------------------------|
| Comparability | Comparability of cases and controls on the basis of the design or analysis | Study controls for maternal age and maternal alcohol consumption (for 1 star) and additionally for maternal folic acid supplementation and body mass index (for 2 stars) | Major confounding factors not controlled for                                       |
| Exposure      | Ascertainment of exposure                                                  | Structured interview where blind to case/control status                                                                                                                  | Interview not blinded to case/control status or self-completed survey or no record |
|               | Ascertainment of exposure for cases and controls                           | Same method used for cases and controls                                                                                                                                  | Different method used for cases and controls                                       |
|               | Non-Response rate                                                          | Similar rate for cases and controls                                                                                                                                      | Non-response rate appreciably different between cases and controls or not stated   |

---

**Supplementary Table 4: Articles Excluded at the Full Text Screening Stage and Reasons for Exclusion**

| Author              | Year | Publication Title                                                                                                             | Reason for exclusion     | Explanation                                                  |
|---------------------|------|-------------------------------------------------------------------------------------------------------------------------------|--------------------------|--------------------------------------------------------------|
| Saxen               | 1974 | Cleft lip and palate in Finland: Parental histories, course of pregnancy and selected environmental factors                   | Study design             | No comparison group                                          |
| Evans et al.        | 1979 | Maternal smoking habits and congenital malformations: A population study                                                      | Association              | No measure of effect calculated between exposure and outcome |
| Ericson et al.      | 1979 | Cigarette smoking as an etiologic factor in cleft lip and palate                                                              | Association              | No measure of effect calculated between exposure and outcome |
| Christianson et al. | 1980 | The relationship between maternal smoking and the incidence of congenital anomalies                                           | Outcome                  | Cleft not specified as an outcome studied                    |
| Hemminki et al      | 1983 | Smoking and the occurrence of congenital malformations and spontaneous abortions: Multivariate analysis                       | Association              | Incomplete measure of effect calculation                     |
| Niebyl et al.       | 1985 | Lack of maternal metabolic, endocrine, and environmental influences in the etiology of cleft lip with or without cleft palate | Association              | No measure of effect calculated between exposure and outcome |
| Khoury et al.       | 1987 | Maternal cigarette smoking and oral clefts: A population-based study                                                          | Multiple report of study | Crossover with Hwang et al., 1995                            |
| Werler et al.       | 1990 | Maternal cigarette smoking during pregnancy in relation to oral clefts                                                        | Multiple report of study | Crossover with Lieff et al 1999                              |
| Loffredo et al.     | 1994 | Oral clefts - a case-control study                                                                                            | Exposure                 | No calculation for smoking as an exposure of interest        |
| Munger et al.       | 1996 | Maternal alcohol use and risk of orofacial cleft birth defects                                                                | Exposure                 | No calculation for smoking as an exposure of interest        |
| Beaty et al         | 1997 | Testing for Interaction between Maternal Smoking and TGFA Genotype among Oral Cleft Cases Born in Maryland 1992–1996          | Multiple report of study | Crossover with Beaty et al., 2001                            |
| Lieff et al.        | 1999 | Selection bias and the use of controls with malformations in case- control studies of birth defects                           | Multiple report of study | Crossover with Lieff et al, 1999                             |
| Romitti et          | 1999 | Candidate genes for non-syndromic cleft                                                                                       | Multiple report          | Crossover with                                               |

|                    |      |                                                                                                                                                                                       |                          |                                                                              |
|--------------------|------|---------------------------------------------------------------------------------------------------------------------------------------------------------------------------------------|--------------------------|------------------------------------------------------------------------------|
| al.                |      | lip and palate and maternal cigarette smoking and alcohol consumption: Evaluation of genotype-environment interactions from a population-based case-control study of orofacial clefts | of study                 | Shi et al 2007                                                               |
| Christensen et al. | 1999 | Oral clefts, transforming growth factor alpha gene variants, and maternal smoking: A population-based case-control study in Denmark, 1991- 1994                                       | Multiple report of study | Crossover with Shi et al 2007                                                |
| Kallen             | 2000 | Multiple malformations and maternal smoking                                                                                                                                           | Outcome                  | Cleft not an outcome                                                         |
| Van Rooij et al.   | 2001 | Smoking, genetic polymorphisms in biotransformation enzymes, and non-syndromic oral clefting: A gene-environment interaction                                                          | Multiple report of study | Crossover with Krapels et al., 2006                                          |
| Yoon et al.        | 2001 | The National Birth Defects Prevention Study                                                                                                                                           | Association              | No association calculated between exposure and outcome                       |
| Kallen             | 2002 | Maternal smoking and congenital malformations                                                                                                                                         | Association              | Incomplete measure of effect calculation                                     |
| Van Rooij et al.   | 2002 | Orofacial clefts and spina bifida: N-acetyltransferase phenotype, maternal smoking, and medication use                                                                                | Multiple report of study | Crossover with Van Rooij et al., 2001 which has a greater number of patients |
| Werler et al.      | 2003 | Findings on potential teratogens from a case-control study in Western Australia                                                                                                       | Outcome                  | Cleft not specified as an outcome studied                                    |
| Lammer et al       | 2004 | Maternal smoking and the risk of orofacial clefts: Susceptibility with NAT1 and NAT2 polymorphisms                                                                                    | Multiple report of study | Crossover with Shaw et al., 1996, which had the primary data                 |
| Bille et al.       | 2005 | Changing lifestyles and oral clefts occurrence in Denmark                                                                                                                             | association              | No association calculated between exposure and outcome                       |
| Rouget et al.      | 2005 | Periconceptional folates and the prevention of orofacial clefts: Role of dietary intakes in France                                                                                    | Multiple report of study | Crossover with Chevrier et al., 2008                                         |
| Lammer et al.      | 2005 | Maternal smoking, genetic variation of glutathione S-transferases, and risk for orofacial clefts                                                                                      | Multiple report of study | Crossover with Shaw et al., 1996, which had the primary data                 |
| Shaw et al.        | 2005 | Endothelial nitric oxide synthase (NOS3) genetic variants, maternal smoking, vitamin use, and risk of human orofacial clefts                                                          | Multiple report of study | Crossover with Shaw et al., 1996, which had the primary data                 |

|                     |      |                                                                                                                                          |                          |                                                                                    |
|---------------------|------|------------------------------------------------------------------------------------------------------------------------------------------|--------------------------|------------------------------------------------------------------------------------|
| Wilcox et al.       | 2007 | Folic acid supplements and risk of facial clefts: National population based case-control study                                           | Exposure                 | No calculation for smoking as an exposure of interest                              |
| Honein et al.       | 2007 | Maternal smoking and environmental tobacco smoke exposure and the risk of orofacial clefts                                               | Multiple report of study | Crossover with MacLehose et al., 2009 which is an updated dataset                  |
| Mossey et al.       | 2007 | Prevention of orofacial clefts: Does pregnancy planning have a role?                                                                     | Exposure                 | No calculation for smoking as an exposure of interest                              |
| Ramirez et al.      | 2007 | Maternal smoking during early pregnancy, GSTP1 and EPHX1 variants, and risk of isolated orofacial clefts                                 | Exposure                 | In this gene-association study, smoking was only analysed within genetic subgroups |
| Gebreab et al.      | 2008 | Visualization and interpretation of birth defects data using linked micromap plots                                                       | Study design             | Descriptive study<br>No calculation for active smoking estimation                  |
| Shaw et al.         | 2009 | Mid-Pregnancy Cotinine and Risks of Orofacial Clefts and Neural Tube Defects                                                             | Exposure                 |                                                                                    |
| MacLehose et al.    | 2009 | Bayesian methods for correcting misclassification: An example from birth defects epidemiology                                            | Multiple report of study | Crossover with Raut et al., 2019<br>Active smoking was not the exposure            |
| Marshall et al.     | 2010 | Oral cleft defects and maternal exposure to ambient air pollutants in New Jersey                                                         | Exposure                 |                                                                                    |
| Munger et al.       | 2011 | Oral clefts and maternal biomarkers of folate-dependent one-carbon metabolism in Utah                                                    | Exposure                 | No calculation for smoking as an exposure of interest                              |
| Zhang et al.        | 2011 | Cigarette smoke exposure before pregnancy and the associated risk of having a child with orofacial clefts in china: A case-control study | Publication type         | Abstract only                                                                      |
| Bahado-Singh et al. | 2011 | Male gender significantly increases risk of oxidative stress related congenital anomalies in the non-diabetic population                 | Exposure                 | Maternal smoking not assessed as an independent exposure                           |
| Wehby et al.        | 2011 | Genes as instruments for studying risk behavior effects: An application to maternal smoking and orofacial clefts                         | Multiple report of study | Primary data from Lie et al., 2008                                                 |
| Zandi et al.        | 2011 | An epidemiologic study of orofacial clefts in Hamedan City, Iran: A 15-year study                                                        | Exposure                 | No smokers in the control group                                                    |
| Reiter et al.       | 2012 | Genetic and environmental risk factors for submucous cleft palate                                                                        | Study design             | Secondary data used for the                                                        |



|                |      |                                                                                                                                              |                  |                                                                            |
|----------------|------|----------------------------------------------------------------------------------------------------------------------------------------------|------------------|----------------------------------------------------------------------------|
|                |      |                                                                                                                                              |                  | control group                                                              |
| Taghavi et al. | 2012 | Orofacial clefts and risk factors in Tehran, Iran: A case control stud                                                                       | Exposure         | Population described as ex-smokers rather than current smokers             |
| Buyu et al.    | 2012 | Orofacial clefts at Bugando Medical Centre: Associated factors and postsurgical complications                                                | Association      | No association calculated between exposure and outcome                     |
| Jurek et al.   | 2013 | Adjusting for outcome misclassification: The importance of accounting for case-control sampling and other forms of outcome-related selection | Study design     | Secondary data used                                                        |
| Jurek et al.   | 2013 | Adjusting for multiple-misclassified variables in a study using birth certificates                                                           | Study design     | Secondary data used                                                        |
| Campos et al.  | 2016 | Environmental factors related to the occurrence of oral clefts in a Brazilian subpopulation                                                  | Study design     | Descriptive study                                                          |
| Kummet et al.  | 2016 | Passive Smoke Exposure as a Risk Factor for Oral Clefts-A Large International Population-Based Study                                         | Study design     | Secondary data used                                                        |
| Sabbagh et al. | 2016 | Environmental risk factors in the aetiology of non-syndromic orofacial clefts in the western region of Saudi Arabia                          | Population       | Paternal smoking                                                           |
| Wehby et al.   | 2017 | Interaction between smoking and body mass index and risk of oral clefts                                                                      | Study design     | Secondary data used                                                        |
| Lili et al.    | 2017 | Association between non-syndromic cleft lip with or without cleft palate and environmental factors in Ningxia                                | Population       | Paternal smoking<br>No association calculated between exposure and outcome |
| Gao et al.     | 2017 | Do smoking bans improve infant health? Evidence from U.S. Births: 1995-2009                                                                  | Association      | No association calculated between exposure and outcome                     |
| Silva et al.   | 2018 | Risk factors and comorbidities in Brazilian patients with orofacial clefts                                                                   | Study design     | Descriptive study                                                          |
| Crossan et al. | 2018 | Is there an association between maternal smoking and oral clefts?                                                                            | Publication type | Review                                                                     |
| Bui et al.     | 2018 | Association Between Cleft Lip and/or Cleft Palate and Family History of Cancer: A Case-Control Study                                         | Population       | No defined maternal smoking group                                          |
| Bui et al.     | 2018 | Maternal Tobacco Exposure and Development of Orofacial Clefts in the Child                                                                   | Population       | Paternal smoking                                                           |
| Acs et al.     | 2019 | First data from the new, unified database of the Hungarian case-control surveillance of congenital abnormalities                             | Association      | No association calculated between                                          |

|                  |      |                                                                                                                              |                          | exposure and outcome                                             |
|------------------|------|------------------------------------------------------------------------------------------------------------------------------|--------------------------|------------------------------------------------------------------|
| Dastgiri et al.  | 2019 | Estimation of the preventable proportion of congenital anomalies by selected risk factors in mothers: A case study in Iran   | Population               | No definition of maternal smoking group                          |
| Yu et al.        | 2019 | Birth anomalies in monozygotic and dizygotic twins: Results from the California twin registry                                | Exposure                 | Smoking was a cofactor and not an independently studied exposure |
| Chowchuen et al. | 2020 | Birth Prevalence and Risk Factors Associated With CL/P in Thailand                                                           | Exposure                 | No association calculation for active smoking                    |
| Hong et al.      | 2020 | Environmental Risk Factors for Non-syndromic Cleft Lip and/or Cleft Palate in Xinjiang Province, China: A Multi-ethnic Study | Population               | Paternal smoking                                                 |
| Kruse et al.     | 2020 | Impact of Maternal Smoking on Non-syndromic Clefts: Sex-Specific Associations With Side and Laterality                       | Study design             | Descriptive study                                                |
| Heinke et al.    | 2020 | Quantification of selection bias in studies of risk factors for birth defects among livebirths                               | Multiple report of study | Crossover with Raut et al., 2019                                 |

**Supplementary Table 5: Confounding Factors Adjusted For in All Included Studies**

| Author               | Year | Maternal age | Alcohol | Folic Acid | Obesity |
|----------------------|------|--------------|---------|------------|---------|
| Shiono et al.        | 1986 | ◆            | ◆       |            |         |
| Khoury et al.        | 1989 | ◆            | ◆       |            |         |
| Malloy et al.        | 1989 | ◆            |         |            |         |
| Van Den Eeden et al. | 1990 | ◆            | ◆       |            |         |
| McDonald et al.      | 1992 | ◆            | ◆       |            |         |
| Hwang et al.         | 1995 | ◆            |         |            |         |
| Shaw et al.          | 1996 | ◆            | ◆       | ◆          |         |
| Kallen               | 1997 | ◆            |         |            |         |
| Lieff et al.         | 1999 | ◆            |         |            |         |
| Lorente et al.       | 2000 | ◆            | ◆       |            |         |
| Chung et al.         | 2000 | ◆            | ◆       |            |         |
| Beaty et al.         | 2001 | ◆            | ◆       | ◆          |         |
| Woods et al.         | 2001 | ◆            |         |            |         |
| Wyszynski and Wu     | 2002 | ◆            | ◆       |            |         |
| DeRoo et al.         | 2003 | ◆            |         |            |         |
| Little et al.        | 2004 |              | ◆       | ◆          |         |
| Meyer et al.         | 2004 | ◆            |         |            |         |
| Krapels et al.       | 2006 |              | ◆       | ◆          |         |
| Shi et al. A         | 2007 |              | ◆       | ◆          |         |
| Shi et al. B         | 2007 | ◆            | ◆       |            |         |
| Bille et al.         | 2007 | ◆            | ◆       | ◆          |         |
| Grewal et al.        | 2008 | ◆            | ◆       | ◆          | ◆       |
| Lie et al.           | 2008 | ◆            | ◆       | ◆          |         |
| Chevrier et al.      | 2008 | ◆            | ◆       | ◆          |         |
| Leite and Koifman    | 2009 | ◆            | ◆       |            |         |
| Lebby et al.         | 2010 | ◆            | ◆       |            |         |
| Mirilas et al.       | 2011 |              |         |            |         |
| Zhang et al.         | 2011 | ◆            | ◆       | ◆          |         |
| Wehby et al.         | 2011 |              | ◆       | ◆          | ◆       |
| Ibarra-Lopez et al.  | 2013 |              |         | ◆          |         |
| Gunnerbeck et al.    | 2014 | ◆            |         |            |         |
| Leite et al.         | 2014 | ◆            |         |            | ◆       |
| Salihu et al.        | 2014 | ◆            |         |            |         |
| Bezerra et al.       | 2015 |              | ◆       |            |         |
| Hao et al.           | 2015 | ◆            | ◆       |            | ◆       |
| Martelli et al.      | 2015 |              |         |            |         |
| Figueiredo           | 2015 |              | ◆       |            |         |
| Ebadifar et al.      | 2016 | ◆            |         |            |         |
| Liu et al.           | 2016 |              |         |            |         |
| Angulo-Castro et al. | 2017 |              | ◆       | ◆          |         |
| Xu et al.            | 2018 | ◆            | ◆       | ◆          |         |
| Raut et al.          | 2019 | ◆            | ◆       | ◆          | ◆       |
| Sato et al.          | 2020 | ◆            | ◆       | ◆          | ◆       |

|                  |      |   |   |   |   |
|------------------|------|---|---|---|---|
| Acs et al.       | 2020 | ◆ | ◆ |   |   |
| Regina et al     | 2020 |   | ◆ | ◆ | ◆ |
| Ausländer et al. | 2020 | ◆ | ◆ | ◆ | ◆ |

oovidsp.dc2.ovid.com.bris.idm.oclc.org/ovid-a/ovidweb.cgi?&S=PCIPFPPOONEBGFHCJPAKFFBFNPJAAA00&C=\_main&tab=search&Main+Search+Page=1

Search Journals Multimedia My Workspace What's New

▼ Search History (13)

| # ▲ | Searches                                                                                                                                                                                                                                                                                                                                           | Results | Type     | Actions                  | Annotations |
|-----|----------------------------------------------------------------------------------------------------------------------------------------------------------------------------------------------------------------------------------------------------------------------------------------------------------------------------------------------------|---------|----------|--------------------------|-------------|
| 1   | Cleft Lip/                                                                                                                                                                                                                                                                                                                                         | 15250   | Advanced | Display Results   More ▾ |             |
| 2   | Cleft Palate/                                                                                                                                                                                                                                                                                                                                      | 20758   | Advanced | Display Results   More ▾ |             |
| 3   | cleft*.mp. [mp=title, abstract, original title, name of substance word, subject heading word, floating sub-heading word, keyword heading word, organism supplementary concept word, protocol supplementary concept word, rare disease supplementary concept word, unique identifier, synonyms]                                                     | 49735   | Advanced | Display Results   More ▾ |             |
| 4   | 1 or 2 or 3                                                                                                                                                                                                                                                                                                                                        | 49735   | Advanced | Display Results   More ▾ |             |
| 5   | smoking/ or tobacco smoking/ or cigarette smoking/                                                                                                                                                                                                                                                                                                 | 143920  | Advanced | Display Results   More ▾ |             |
| 6   | Tobacco/                                                                                                                                                                                                                                                                                                                                           | 31113   | Advanced | Display Results   More ▾ |             |
| 7   | Nicotine/                                                                                                                                                                                                                                                                                                                                          | 25741   | Advanced | Display Results   More ▾ |             |
| 8   | Tobacco Products/                                                                                                                                                                                                                                                                                                                                  | 4375    | Advanced | Display Results   More ▾ |             |
| 9   | (smok* or tobacco* or nicotine or cigarette*).mp. [mp=title, abstract, original title, name of substance word, subject heading word, floating sub-heading word, keyword heading word, organism supplementary concept word, protocol supplementary concept word, rare disease supplementary concept word, unique identifier, synonyms]              | 402720  | Advanced | Display Results   More ▾ |             |
| 10  | 5 or 6 or 7 or 8 or 9                                                                                                                                                                                                                                                                                                                              | 402720  | Advanced | Display Results   More ▾ |             |
| 11  | 4 and 10                                                                                                                                                                                                                                                                                                                                           | 414     | Advanced | Display Results   More ▾ |             |
| 12  | (maternal or pregnan* or pre-natal or prenatal or mother*).mp. [mp=title, abstract, original title, name of substance word, subject heading word, floating sub-heading word, keyword heading word, organism supplementary concept word, protocol supplementary concept word, rare disease supplementary concept word, unique identifier, synonyms] | 1229410 | Advanced | Display Results   More ▾ |             |
| 13  | 4 and 10 and 12                                                                                                                                                                                                                                                                                                                                    | 315     | Advanced | Display Results   More ▾ |             |

Save Remove Combine with: AND OR Type here to search

11:17 09/11/2020

**Search History (14)**

| #  | Searches                                                                                                                                                                                                                                              | Results | Type     | Actions              | Annotations |
|----|-------------------------------------------------------------------------------------------------------------------------------------------------------------------------------------------------------------------------------------------------------|---------|----------|----------------------|-------------|
| 1  | exp cleft lip/ or "cleft lip with or without cleft palate"/ or lip malformation/                                                                                                                                                                      | 14462   | Advanced | Display Results More |             |
| 2  | cleft palate/ or palate malformation/                                                                                                                                                                                                                 | 19901   | Advanced | Display Results More |             |
| 3  | cleft* .mp. [mp=title, abstract, heading word, drug trade name, original title, device manufacturer, drug manufacturer, device trade name, keyword, floating subheading word, candidate term word]                                                    | 54276   | Advanced | Display Results More |             |
| 4  | 1 or 2 or 3                                                                                                                                                                                                                                           | 55389   | Advanced | Display Results More |             |
| 5  | smoking/ or cigarette smoking/ or parental smoking/                                                                                                                                                                                                   | 358206  | Advanced | Display Results More |             |
| 6  | exp cigarette/ or cigarette smoke/ or cigarette smoking/                                                                                                                                                                                              | 68633   | Advanced | Display Results More |             |
| 7  | tobacco/                                                                                                                                                                                                                                              | 45345   | Advanced | Display Results More |             |
| 8  | nicotine/                                                                                                                                                                                                                                             | 43534   | Advanced | Display Results More |             |
| 9  | (smok* or tobacco* or nicotine or cigarette*).mp. [mp=title, abstract, heading word, drug trade name, original title, device manufacturer, drug manufacturer, device trade name, keyword, floating subheading word, candidate term word]              | 616647  | Advanced | Display Results More |             |
| 10 | 5 or 6 or 7 or 8 or 9                                                                                                                                                                                                                                 | 616647  | Advanced | Display Results More |             |
| 11 | maternal smoking/                                                                                                                                                                                                                                     | 6866    | Advanced | Display Results More |             |
| 12 | (maternal or pregnan* or pre-natal or prenatal or mother*).mp. [mp=title, abstract, heading word, drug trade name, original title, device manufacturer, drug manufacturer, device trade name, keyword, floating subheading word, candidate term word] | 1253749 | Advanced | Display Results More |             |
| 13 | 11 or 12                                                                                                                                                                                                                                              | 1253749 | Advanced | Display Results More |             |
| 14 | 4 and 10 and 13                                                                                                                                                                                                                                       | 544     | Advanced | Display Results More |             |

**Search History**

[Web of Science Core Collection](#)

| Set | Results                                                                                                                                                              | Edit Sets | Combine Sets                                                                                 | Delete Sets                                                                        |
|-----|----------------------------------------------------------------------------------------------------------------------------------------------------------------------|-----------|----------------------------------------------------------------------------------------------|------------------------------------------------------------------------------------|
| # 4 | 474 #3 AND #2 AND #1<br><i>Indexes=SCI-EXPANDED, SSCI, A&amp;HCI, CPCI-S, CPCI-SSH, ESCI Timespan=All years</i>                                                      | Edit      | <input type="radio"/> AND <input type="radio"/> OR<br><input type="button" value="Combine"/> | <input type="button" value="Select All"/><br><input type="button" value="Delete"/> |
| # 3 | 915,609 TOPIC: (maternal or pregnan* or pre-natal or prenatal or mother*)<br><i>Indexes=SCI-EXPANDED, SSCI, A&amp;HCI, CPCI-S, CPCI-SSH, ESCI Timespan=All years</i> | Edit      | <input type="radio"/> AND <input type="radio"/> OR<br><input type="button" value="Combine"/> | <input type="button" value="Select All"/><br><input type="button" value="Delete"/> |
| # 2 | 43,035 TOPIC: (cleft*)<br><i>Indexes=SCI-EXPANDED, SSCI, A&amp;HCI, CPCI-S, CPCI-SSH, ESCI Timespan=All years</i>                                                    | Edit      | <input type="radio"/> AND <input type="radio"/> OR<br><input type="button" value="Combine"/> | <input type="button" value="Select All"/><br><input type="button" value="Delete"/> |
| # 1 | 465,740 TOPIC: (smok* or tobacco* or nicotine or cigarette*)<br><i>Indexes=SCI-EXPANDED, SSCI, A&amp;HCI, CPCI-S, CPCI-SSH, ESCI Timespan=All years</i>              | Edit      | <input type="radio"/> AND <input type="radio"/> OR<br><input type="button" value="Combine"/> | <input type="button" value="Select All"/><br><input type="button" value="Delete"/> |

https://www.cochranelibrary.com/advanced-search

## Advanced Search

Search manager | Medical terms (MeSH) | PICO search<sup>BETA</sup>

Save search | View saved searches | Search help

Did you know you can now select fields from Search manager using the **S** button (next to the search box)? Search manager lets you add unlimited search lines, view results per line and access the MeSH browser using the new **MeSH** button.

(Word variations have been searched)

Search limits | Send to search manager | Run search

Clear all

|                  |   |                    |   |            |   |                     |   |                  |   |      |
|------------------|---|--------------------|---|------------|---|---------------------|---|------------------|---|------|
| Cochrane Reviews | 1 | Cochrane Protocols | 0 | Editorials | 0 | Special Collections | 0 | Clinical Answers | 0 | More |
|------------------|---|--------------------|---|------------|---|---------------------|---|------------------|---|------|

For COVID-19 related studies, please also see the **Cochrane COVID-19 Study Register**

Filter your results

Type here to search



**A**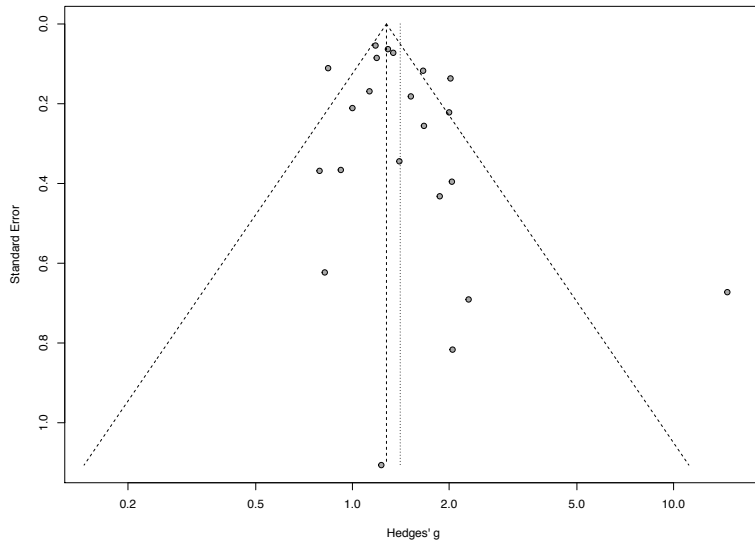**B**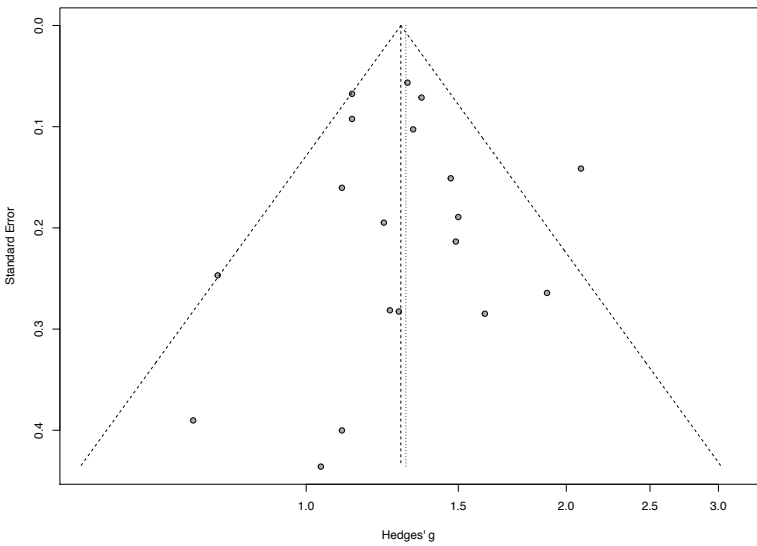**C**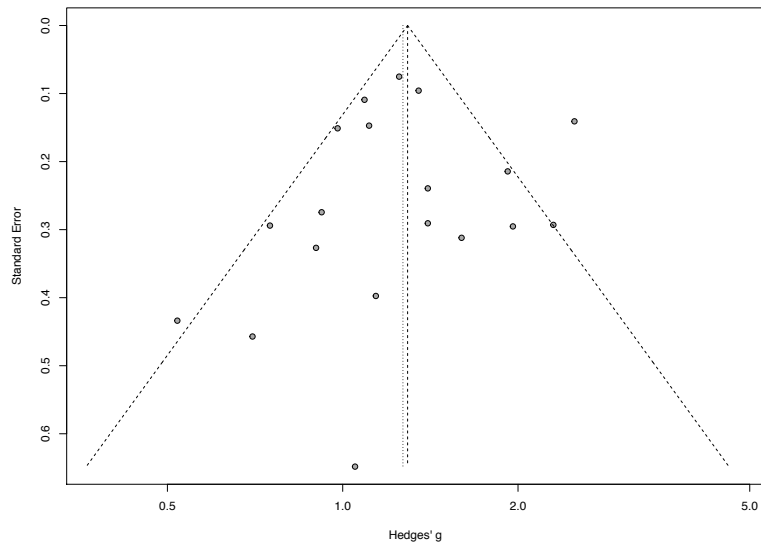

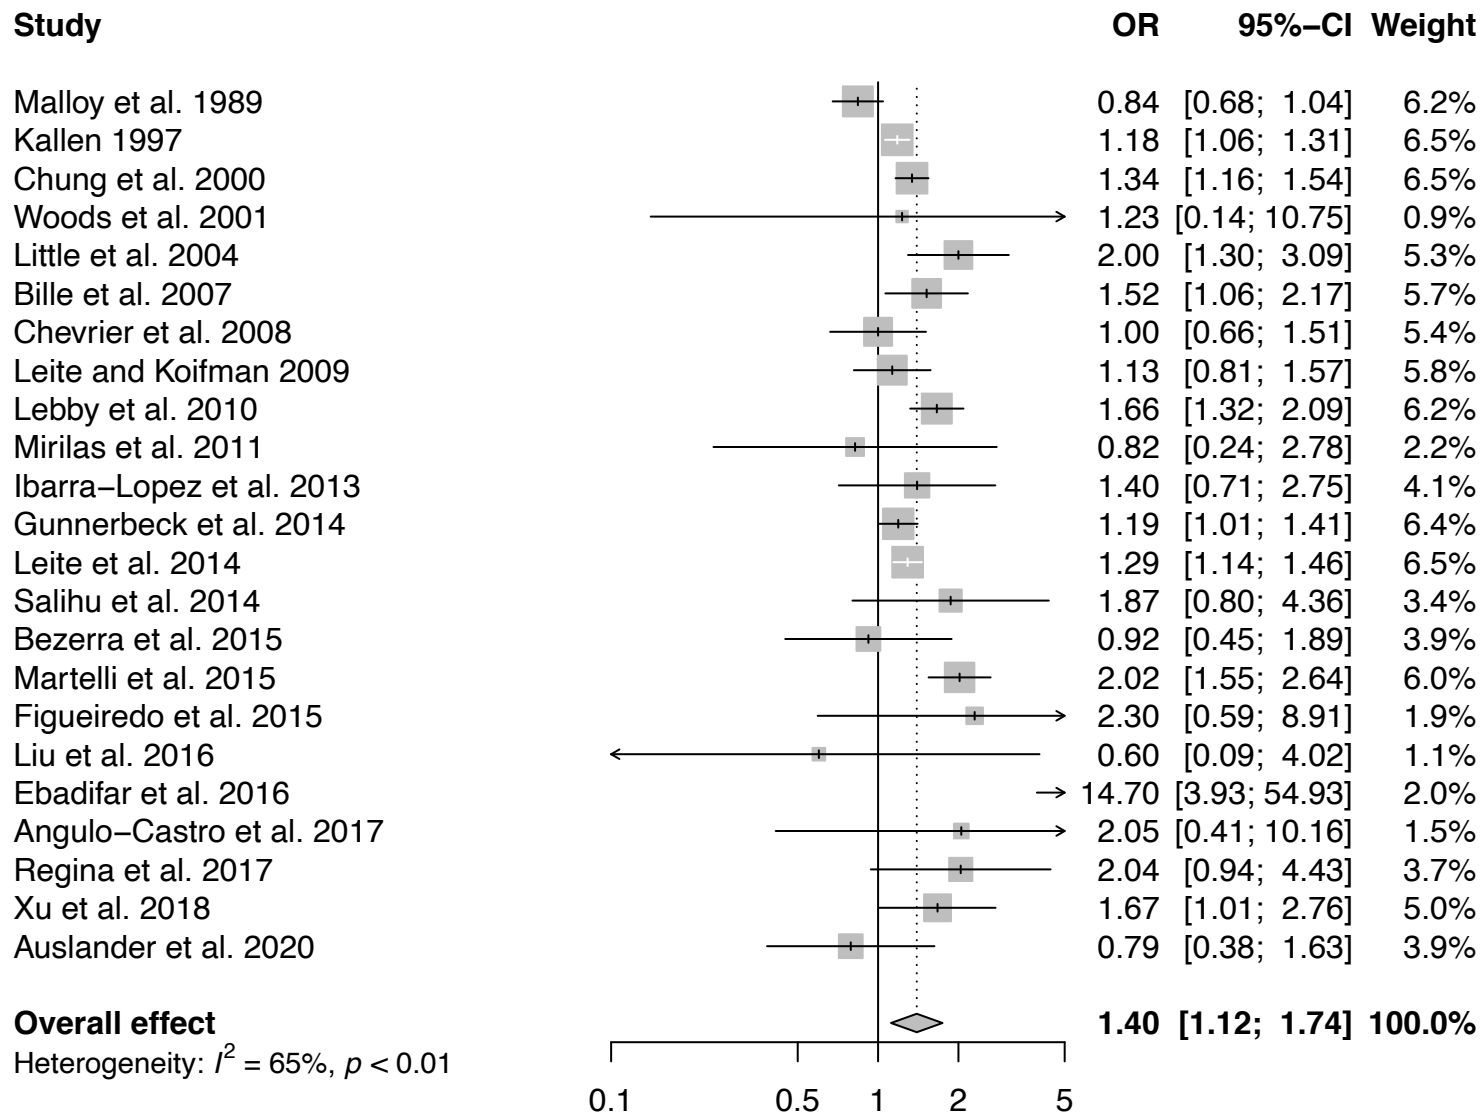

**Study**

**OR 95%-CI Weight**

Shiono et al. 1986  
Khoury et al. 1989  
Van Den Eeden et al. 1990  
Hwang et al. 1995  
Kallen 1997  
Lieff et al. 1999  
Lorente et al. 2000  
Beaty et al. 2001  
DeRoo et al. 2003  
Little et al. 2004  
Bille et al. 2007  
Leite and Koifman 2009  
Gunnerbeck et al. 2014  
Leite et al. 2014  
Hao et al. 2015  
Martelli et al. 2015  
Raut et al. 2019  
Sato et al. 2020  
Auslander et al. 2020

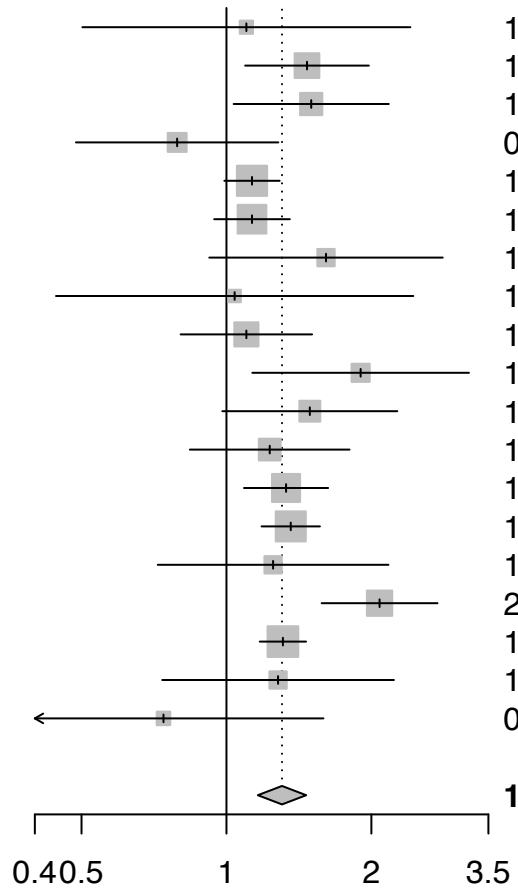

**Overall effect**

Heterogeneity:  $I^2 = 40\%$ ,  $p = 0.04$

**Study**

**OR 95%-CI Weight**

Shiono et al. 1986  
Khoury et al. 1989  
Van Den Eeden et al. 1990  
Hwang et al. 1995  
Kallen 1997  
Lieff et al. 1999  
Lorente et al. 2000  
Beaty et al. 2001  
DeRoo et al. 2003  
Little et al. 2004  
Krapels et al. 2006  
Bille et al. 2007  
Leite and Koifman 2009  
Gunnerbeck et al. 2014  
Leite et al. 2014  
Hao et al. 2015  
Martelli et al. 2015  
Raut et al. 2019  
Acs et al. 2020

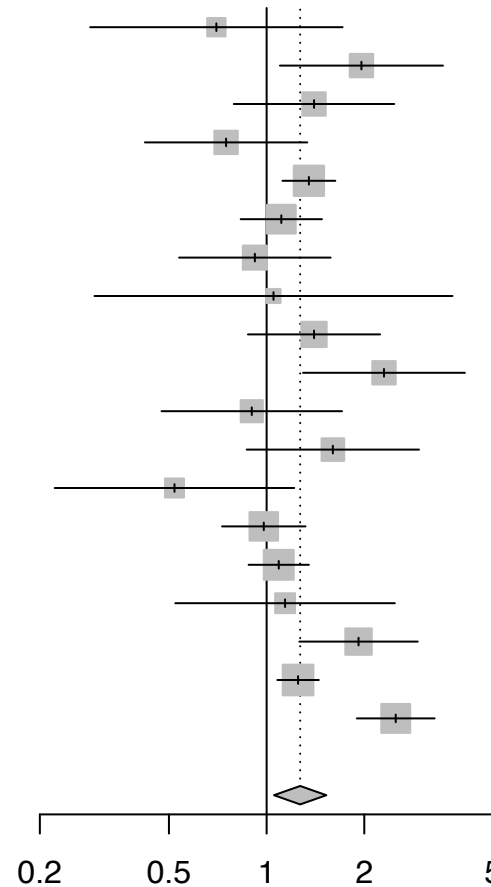

**Overall effect**

Heterogeneity:  $I^2 = 65\%$ ,  $p < 0.01$
